# Supplementary material for: Inherent chirality through a simple dialkylation of 2,14-dithiacalix[4]arene
Source: Royal Society of Chemistry journal article supplement (doi:10.1039/d0nj03468a), 2020-01-01
Supplement: d0nj03468a1.pdf [file d0nj03468a1.pdf]

Supporting Information for

## **Inherent chirality through a simple dialkylation of 2,14-dithiacalix[4]arene**

Daniel Kortus,<sup>†</sup>Ondřej Kunderát,<sup>†</sup> Martin Tlustý,<sup>†</sup> Jan Čejka,<sup>†</sup> Hana Dvořáková<sup>‡</sup> and Pavel Lhoták<sup>†\*</sup>

<sup>†</sup>Department of Organic Chemistry, University of Chemistry and Technology, Prague (UCTP),

Technická 5, 166 28 Prague 6, Czech Republic

<sup>‡</sup>Solid State Department, UCTP, 166 28 Prague 6, Czech Republic.

<sup>\*</sup>Laboratory of NMR spectroscopy, UCTP, 166 28 Prague 6, Czech Republic.

### **Table of contents**

|                                      |    |
|--------------------------------------|----|
| 1. Spectral characterisation .....   | 2  |
| 2. Crystallographic structures ..... | 25 |
| 3. HPLC Measurements .....           | 30 |

# 1. SPECTRAL CHARACTERISATION

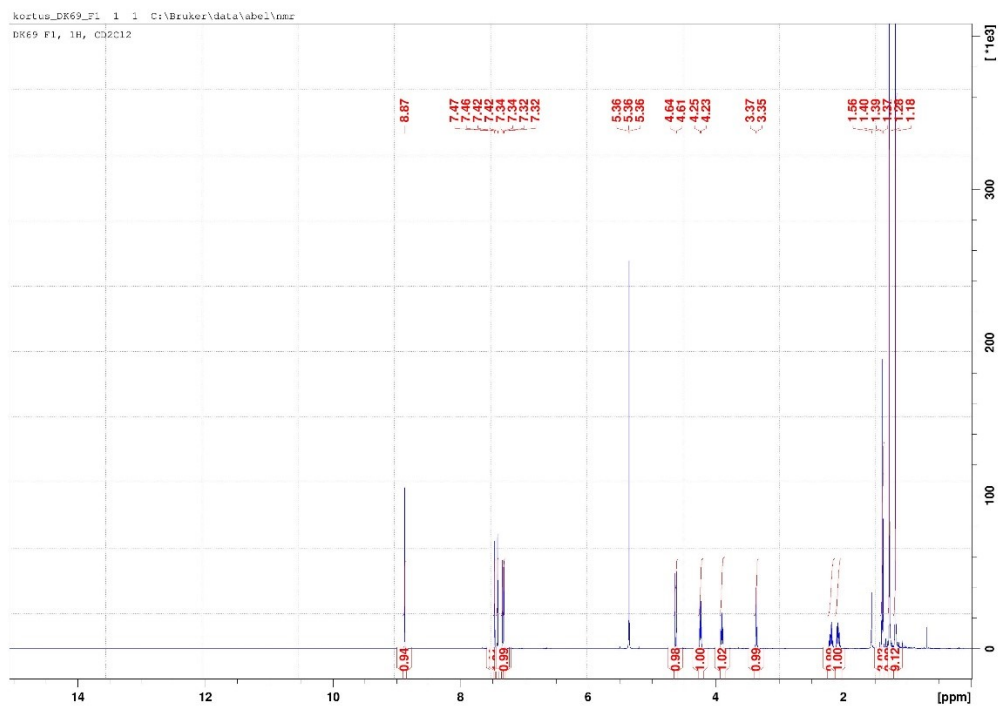

Figure 1. <sup>1</sup>H NMR of compound 4 (CD<sub>2</sub>Cl<sub>2</sub>, 600 MHz).

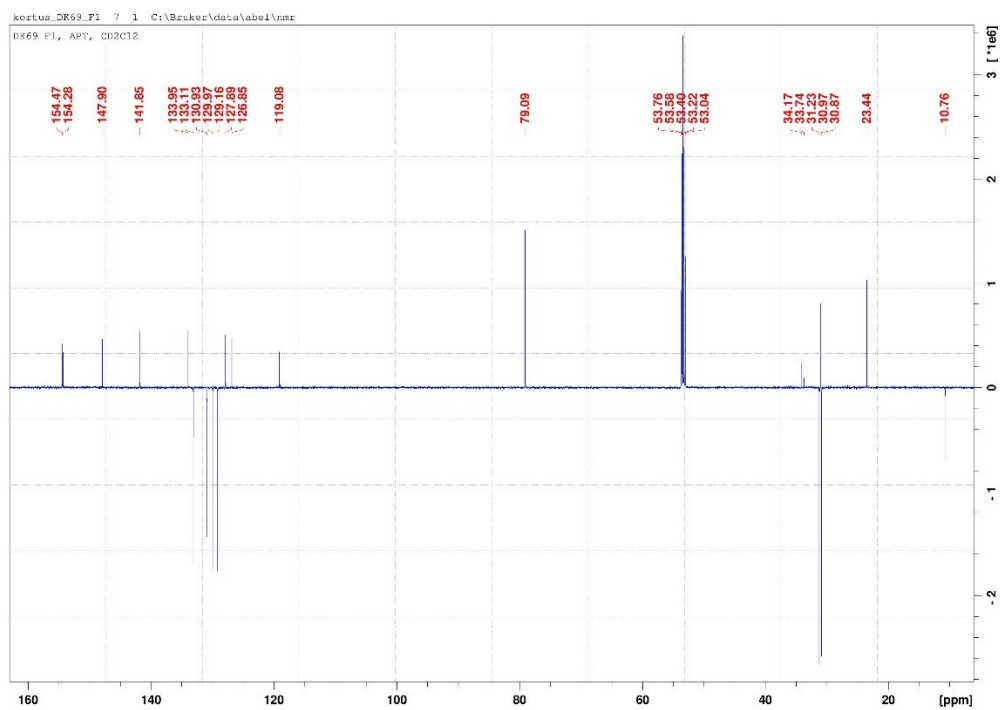

Figure 2. <sup>13</sup>C NMR of compound 4 (CD<sub>2</sub>Cl<sub>2</sub>, 151 MHz).

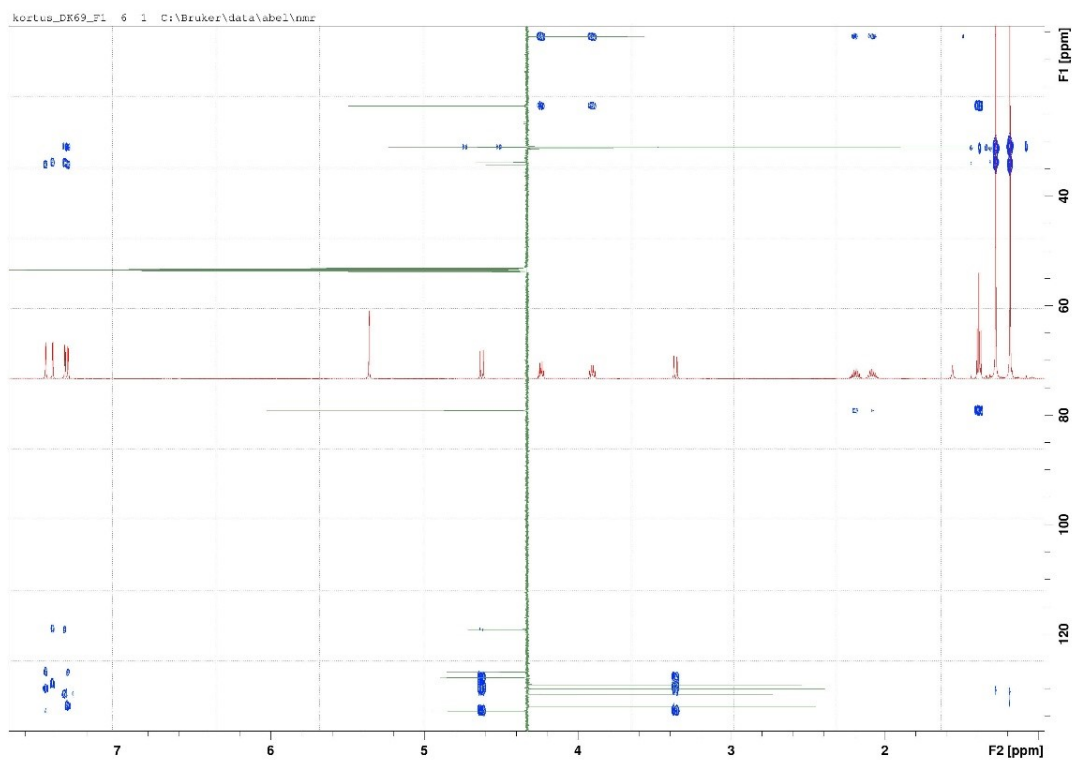

**Figure 3.** HMBC NMR of compound **4** ( $\text{CD}_2\text{Cl}_2$ ).

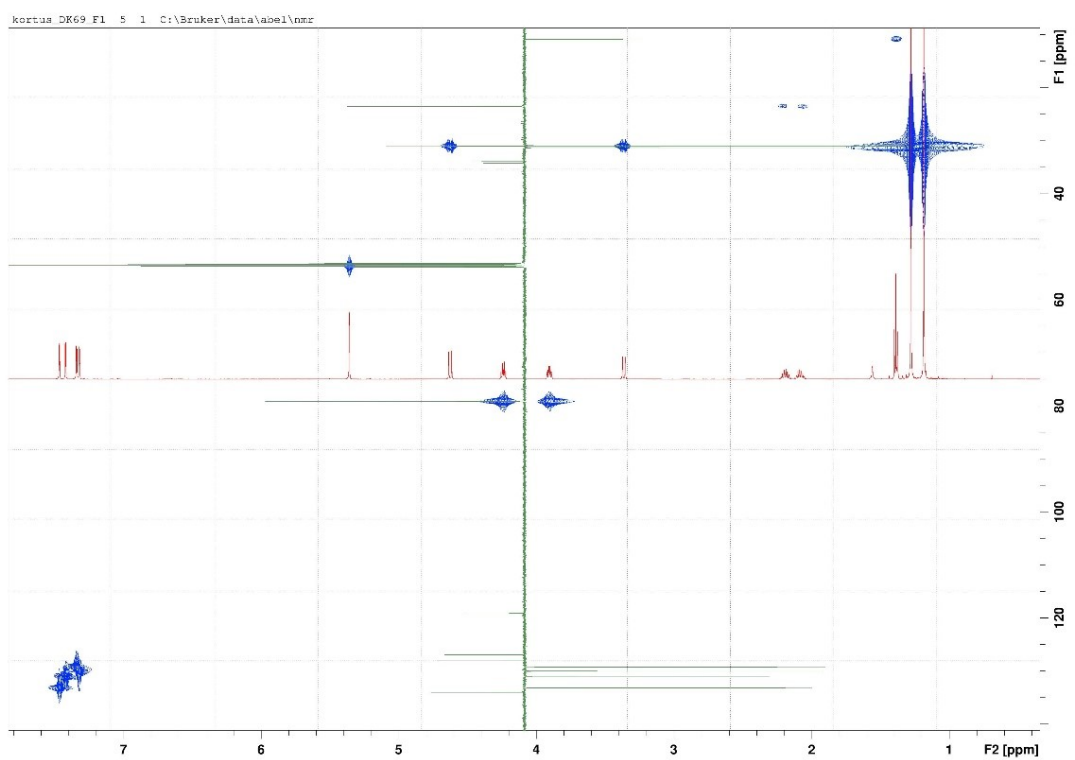

**Figure 4.** HMQC NMR of compound **4** ( $\text{CD}_2\text{Cl}_2$ ).

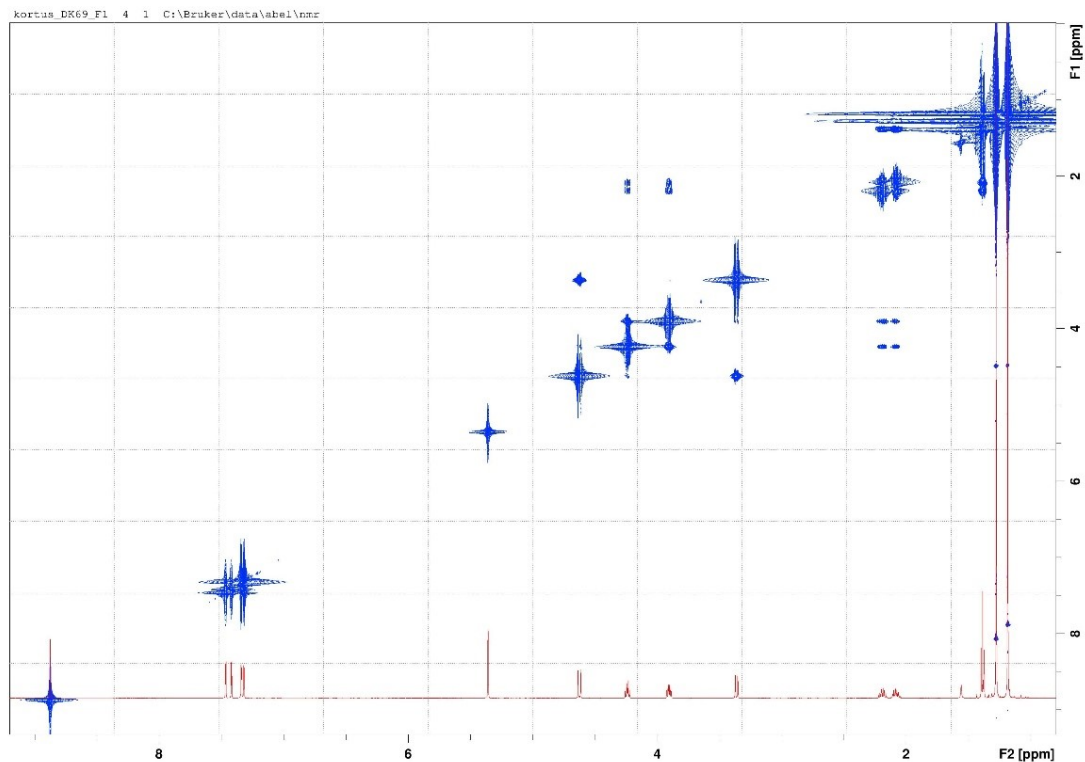

**Figure 5.** COSY NMR of compound **4** ( $\text{CD}_2\text{Cl}_2$ ).

117\_Kortus\_ESIpos\_DK69\_F1\_1 4/2/2019 7:37:04 AM  
 MeOH  
 117\_Kortus\_ESIpos\_DK69\_F1\_1 #53-55 RT: 0.75-0.78 AV: 3 NL: 3.91E7  
 T: FTMS + c ESI Full ms [200.00-2000.00]

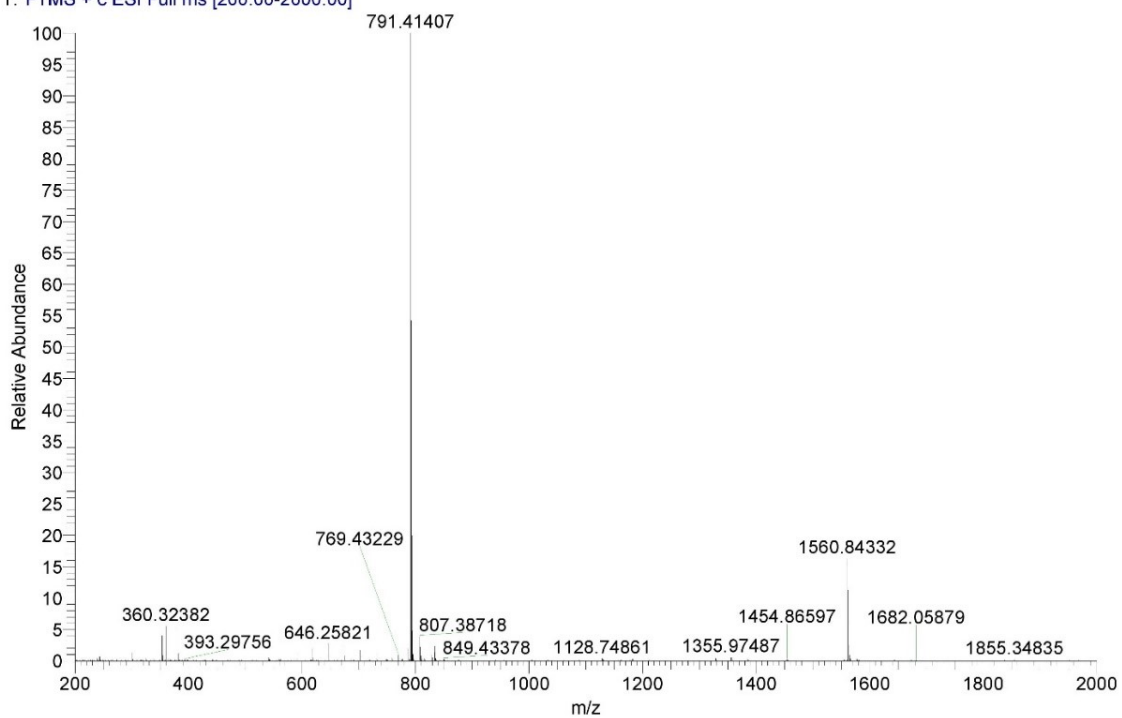

**Figure 6.** HRMS of compound **4** ( $\text{ESI}^+$ ).

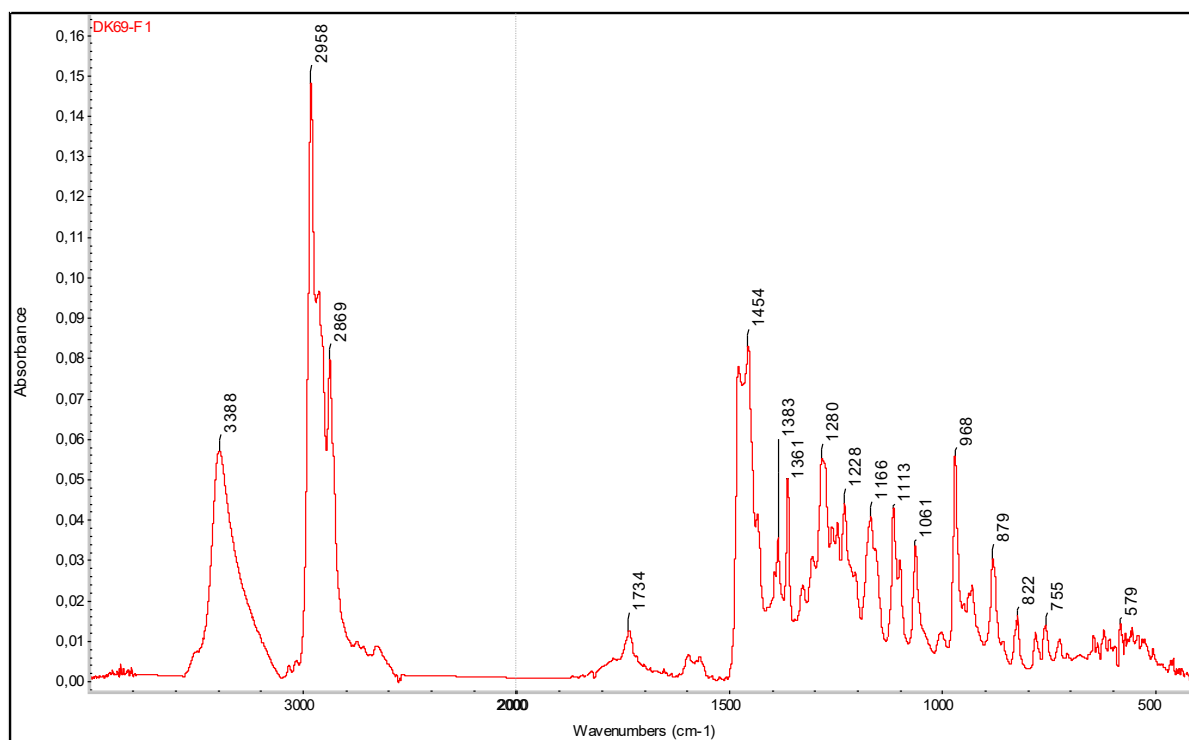

Figure 7. IR of compound 4 (KBr).

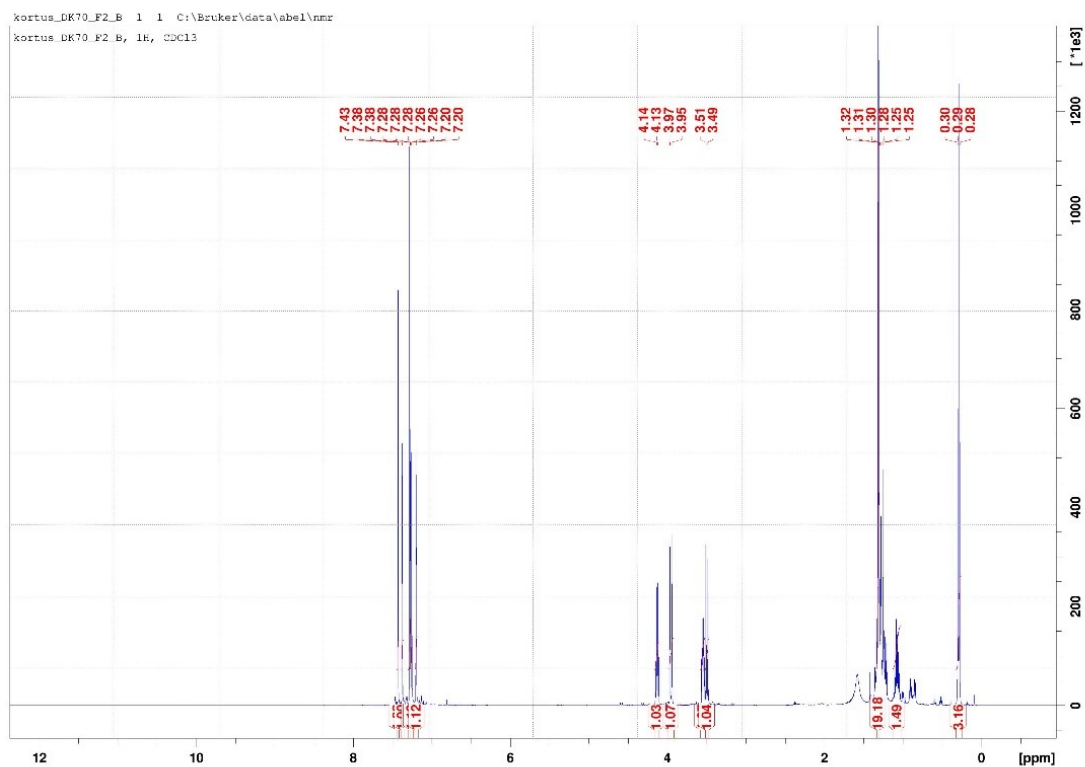

Figure 8.  $^1\text{H}$  NMR of compound 5 ( $\text{CDCl}_3$ , 600 MHz).

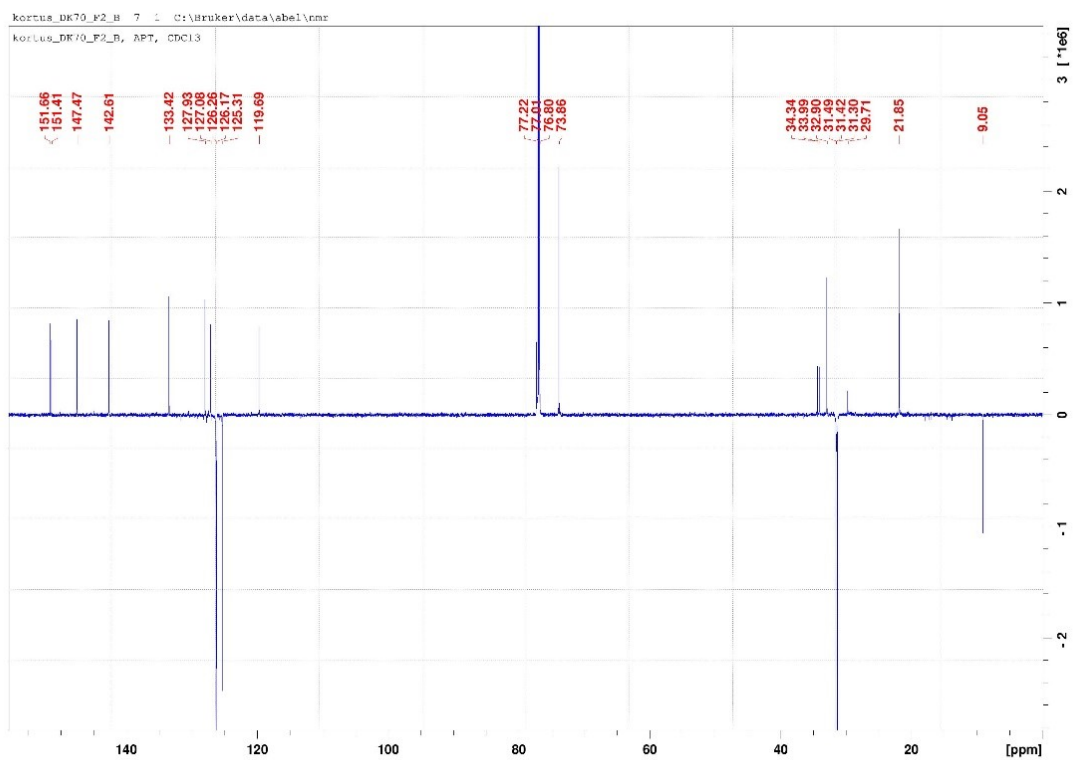

**Figure 9.**  $^{13}\text{C}$  NMR of compound **5** ( $\text{CDCl}_3$ , 151 MHz).

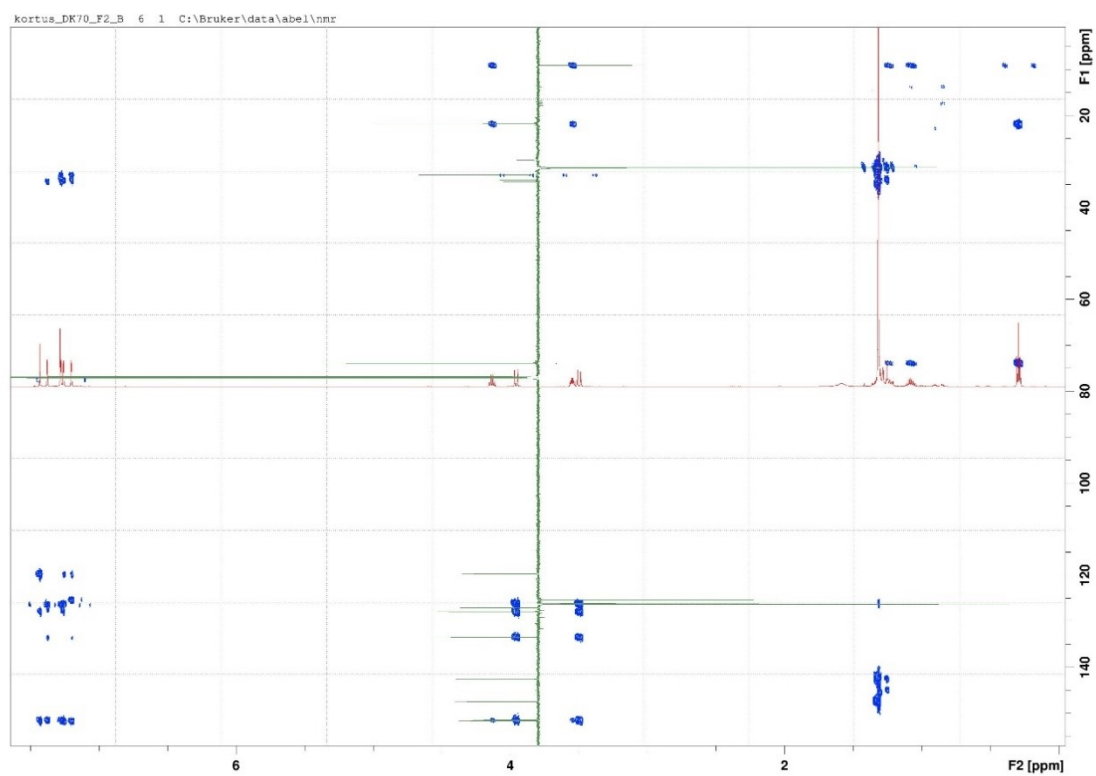

**Figure 10.** HMBC NMR of compound **5** ( $\text{CDCl}_3$ ).

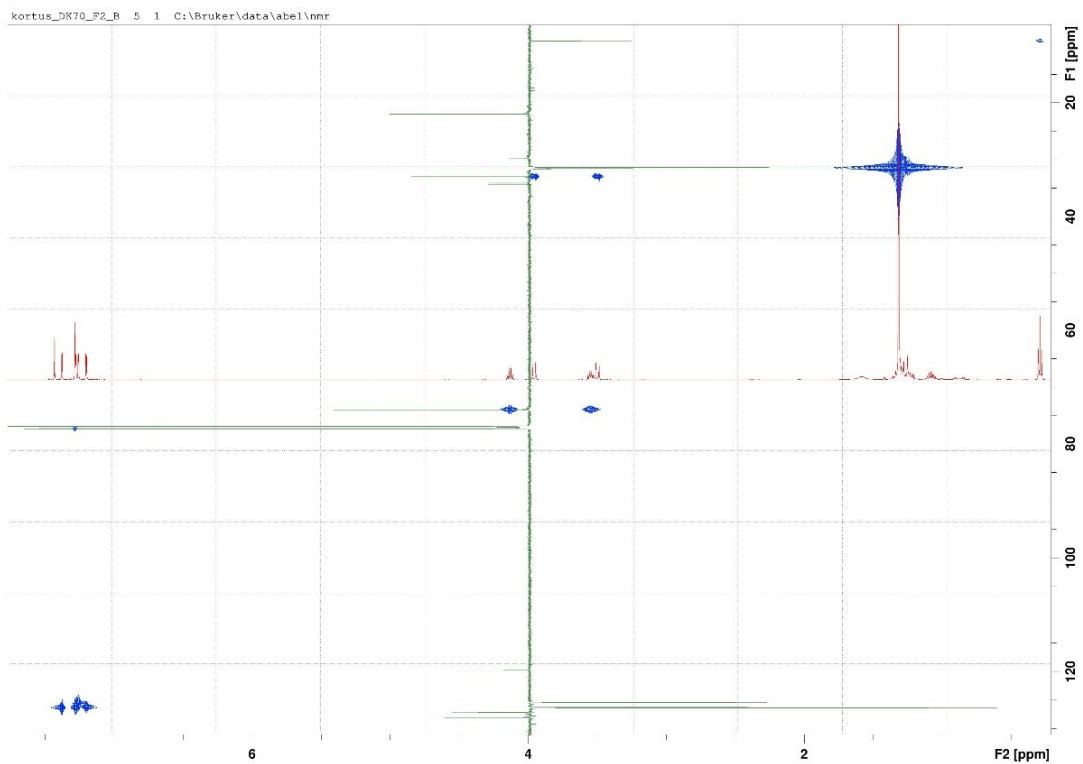

**Figure 11.** HMQC NMR of compound **5** ( $\text{CDCl}_3$ ).

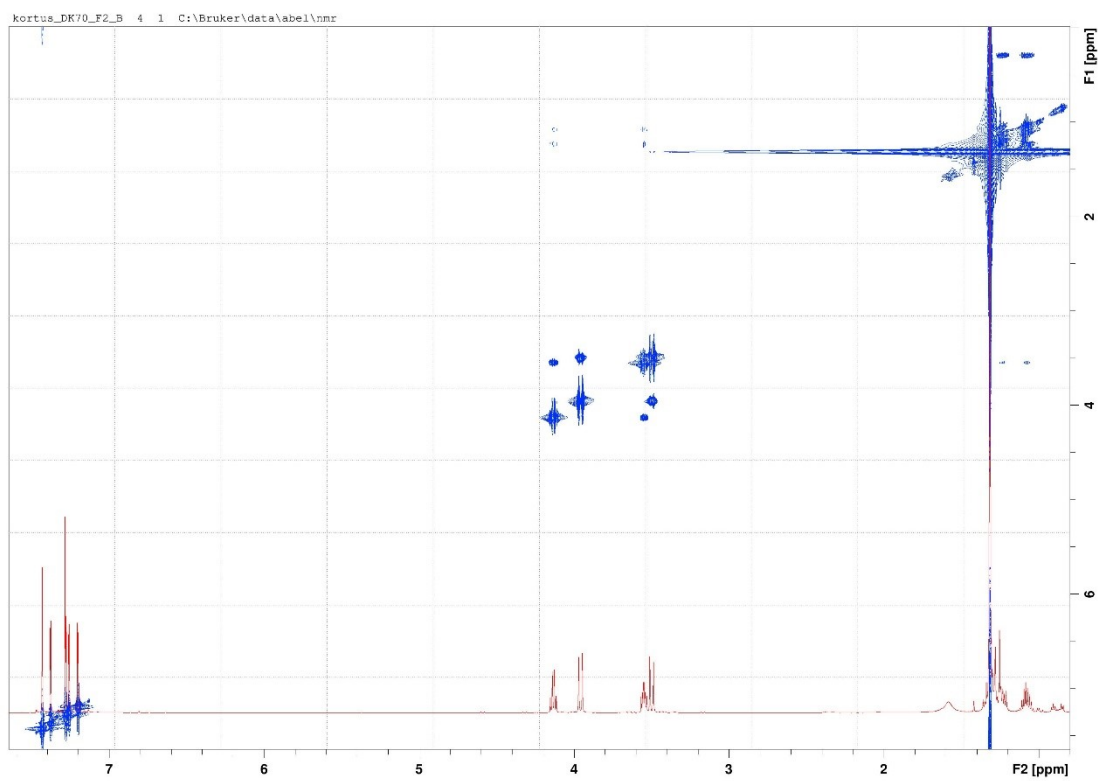

**Figure 12.** COSY NMR of compound **5**.

90\_Kortus\_ESIpos\_DK70\_F2\_1  
MetOH  
6/4/2020 10:03:19 AM  
90\_Kortus\_ESIpos\_DK70\_F2\_1 #15-29 RT: 0.21-0.41 AV: 15 NL: 1.06E7  
T: FTMS + c ESI Full ms [200.00-2000.00]

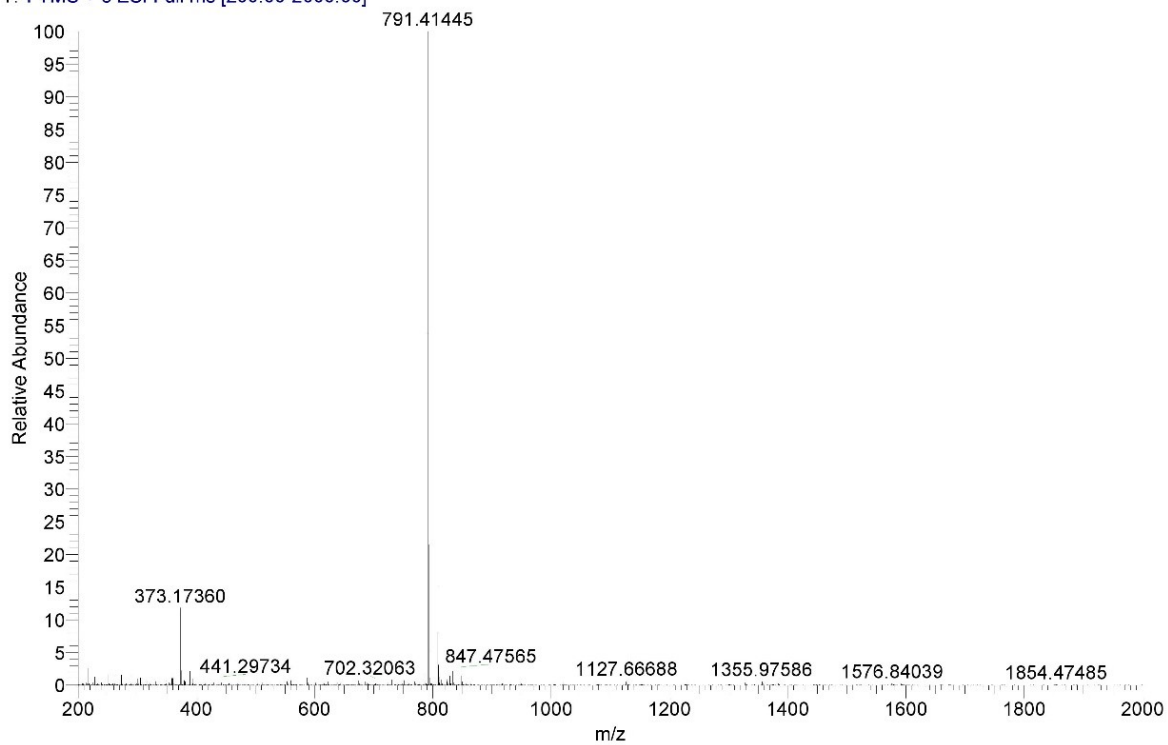

Figure 13. HRMS of compound 5 (ESI<sup>+</sup>).

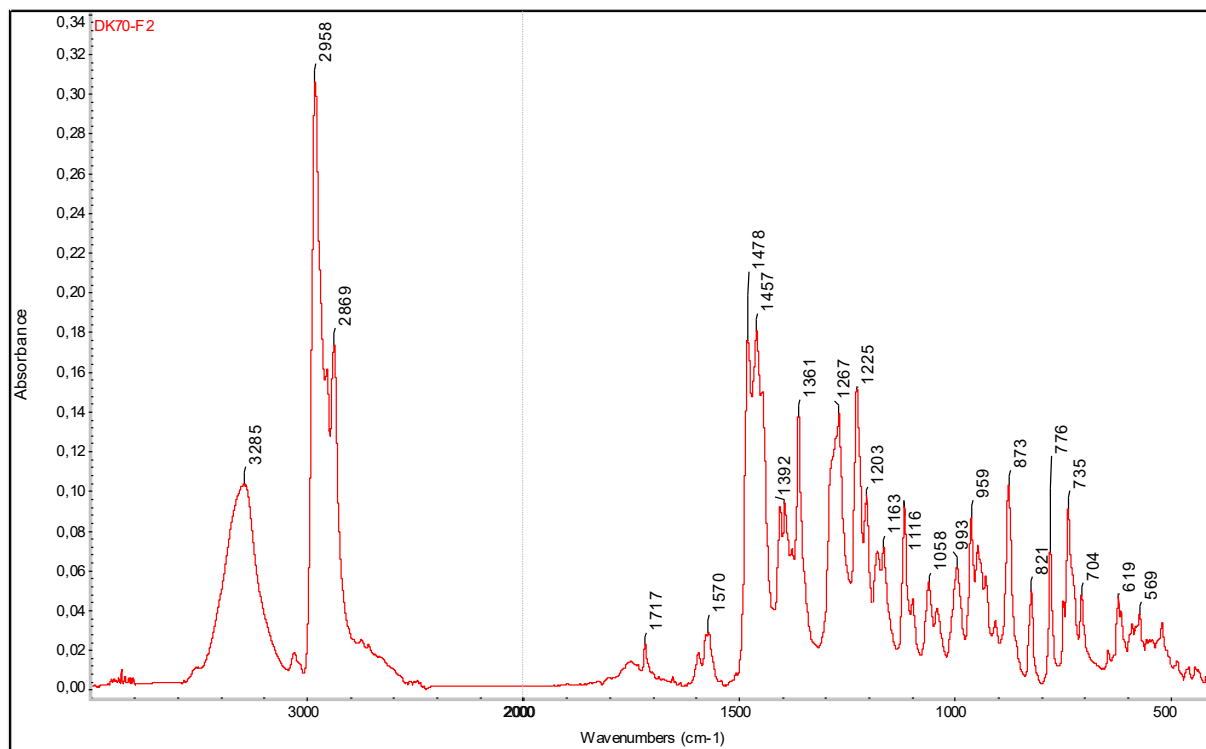

Figure 14. IR of compound 5 (KBr).



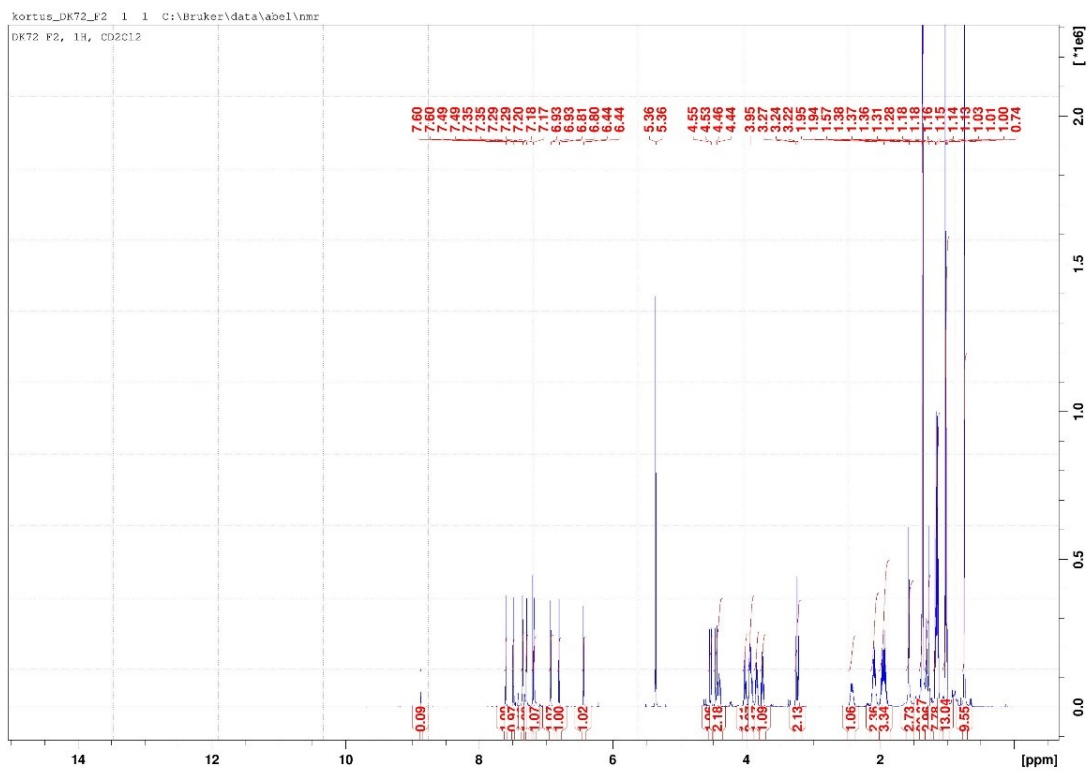

Figure 15.  $^1\text{H}$  NMR of compound **6** ( $\text{CD}_2\text{Cl}_2$ , 600 MHz).

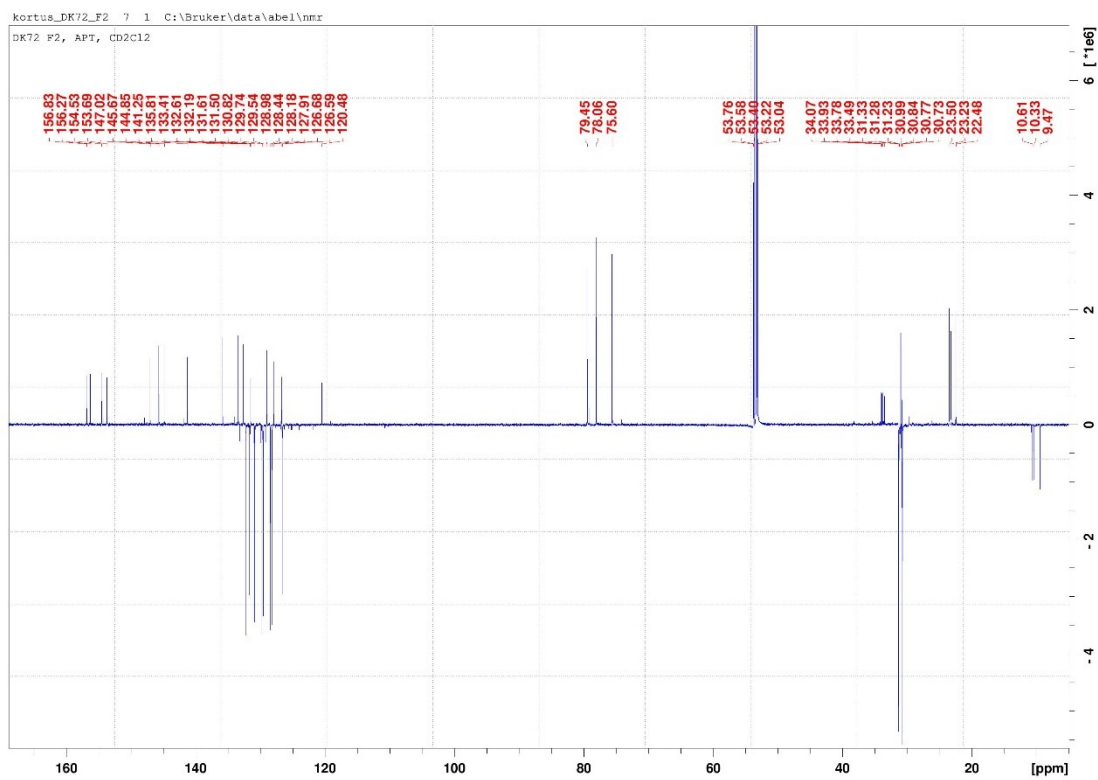

Figure 16.  $^{13}\text{C}$  NMR of compound **6** ( $\text{CD}_2\text{Cl}_2$ , 151 MHz).

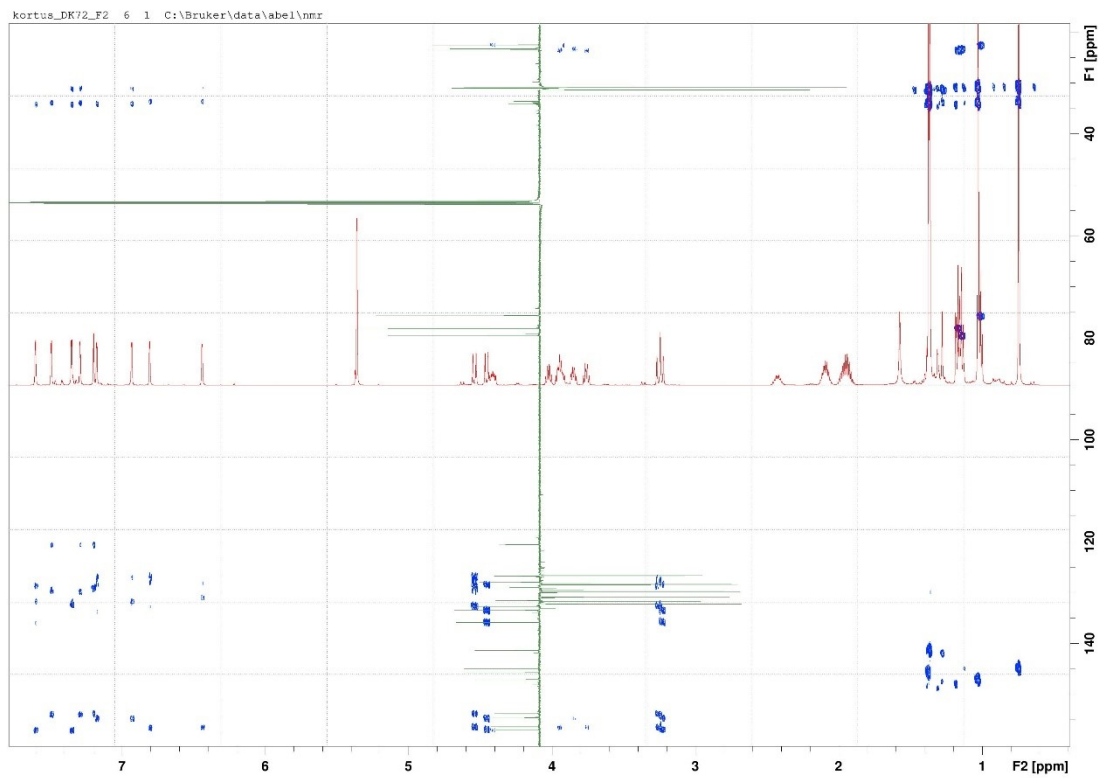

**Figure 17.** HMBC NMR of compound **6** ( $\text{CD}_2\text{Cl}_2$ ).

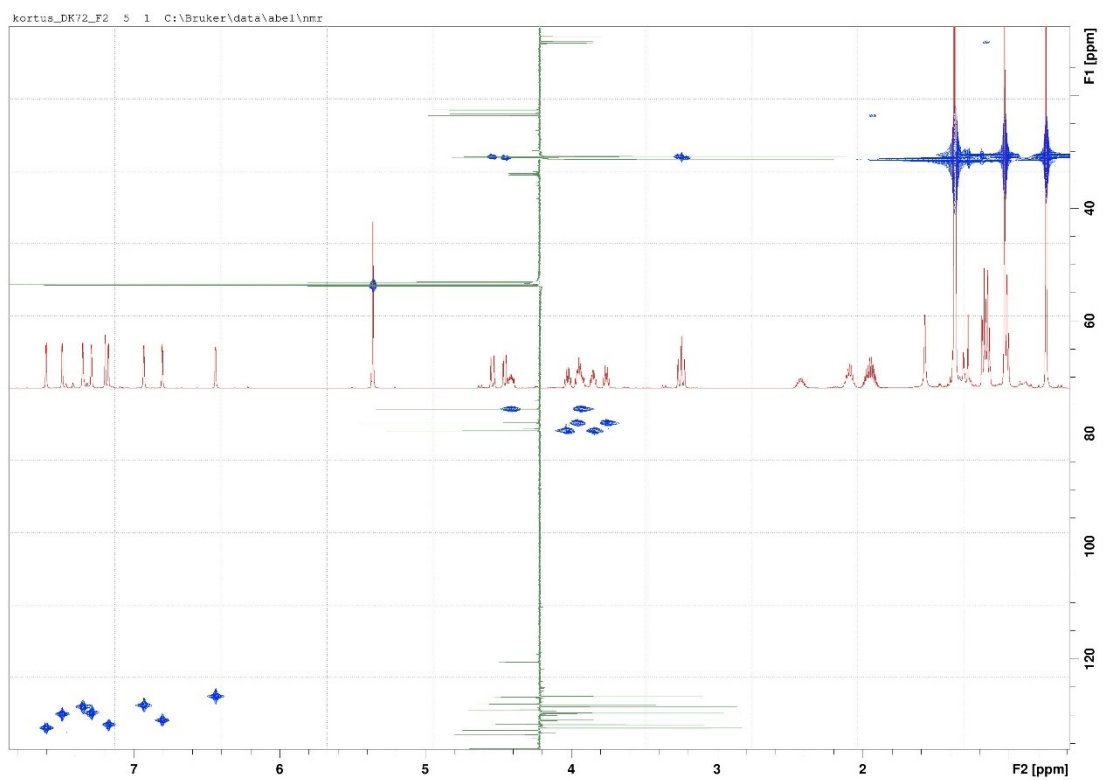

**Figure 18.** HMQC NMR of compound **6** ( $\text{CD}_2\text{Cl}_2$ ).

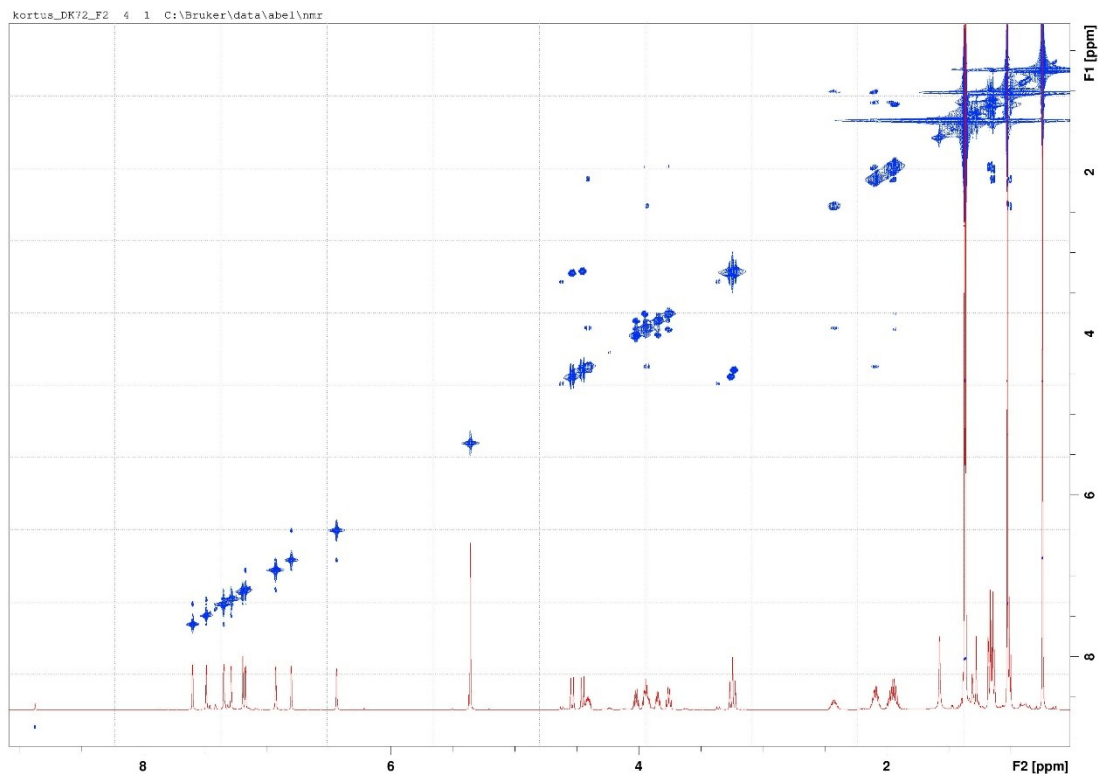

**Figure 19.** COSY NMR of compound **6** ( $\text{CD}_2\text{Cl}_2$ ).

149\_Kortus\_ESIpos\_DK72\_F2\_1  
MeOH

4/24/2019 8:04:39 AM

149\_Kortus\_ESIpos\_DK72\_F2\_1 #46-49 RT: 0.66-0.70 AV: 4 NL: 6.32E7  
T: FTMS + c ESI Full ms [200.00-2000.00]

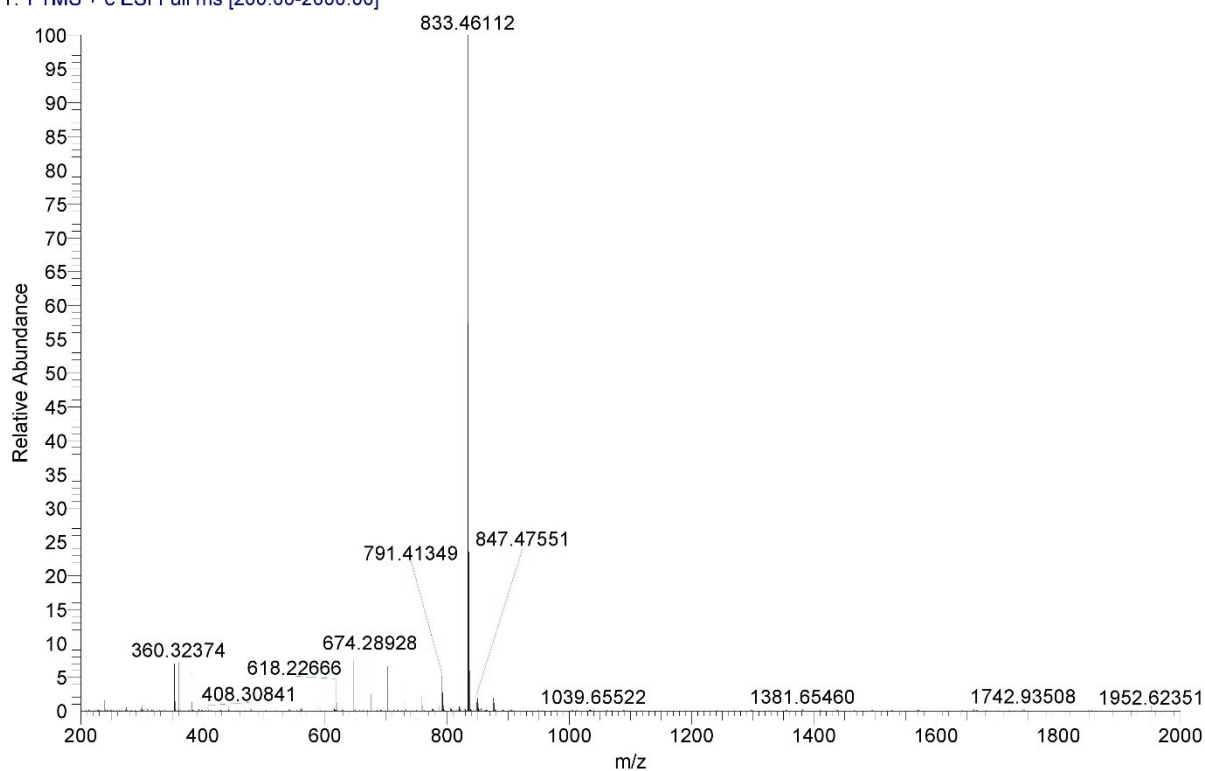

**Figure 20.** HRMS of compound **6** ( $\text{ESI}^+$ ).

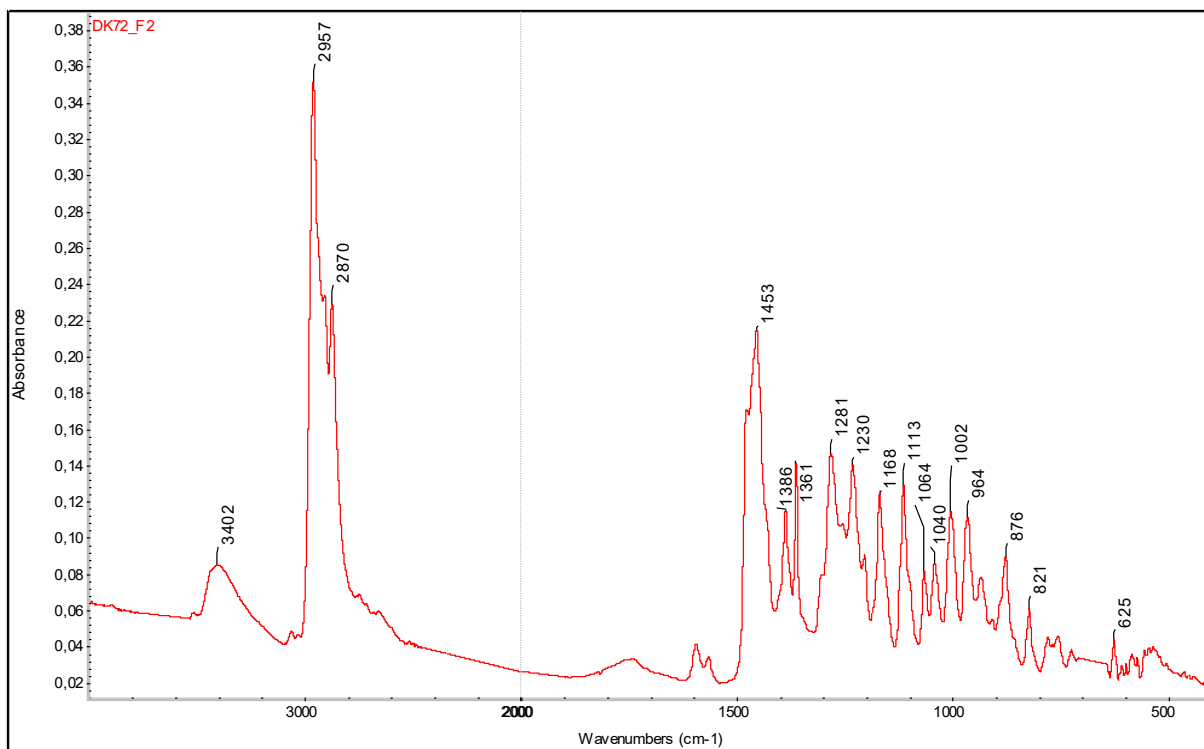

Figure 21. IR of compound 6 (KBr).

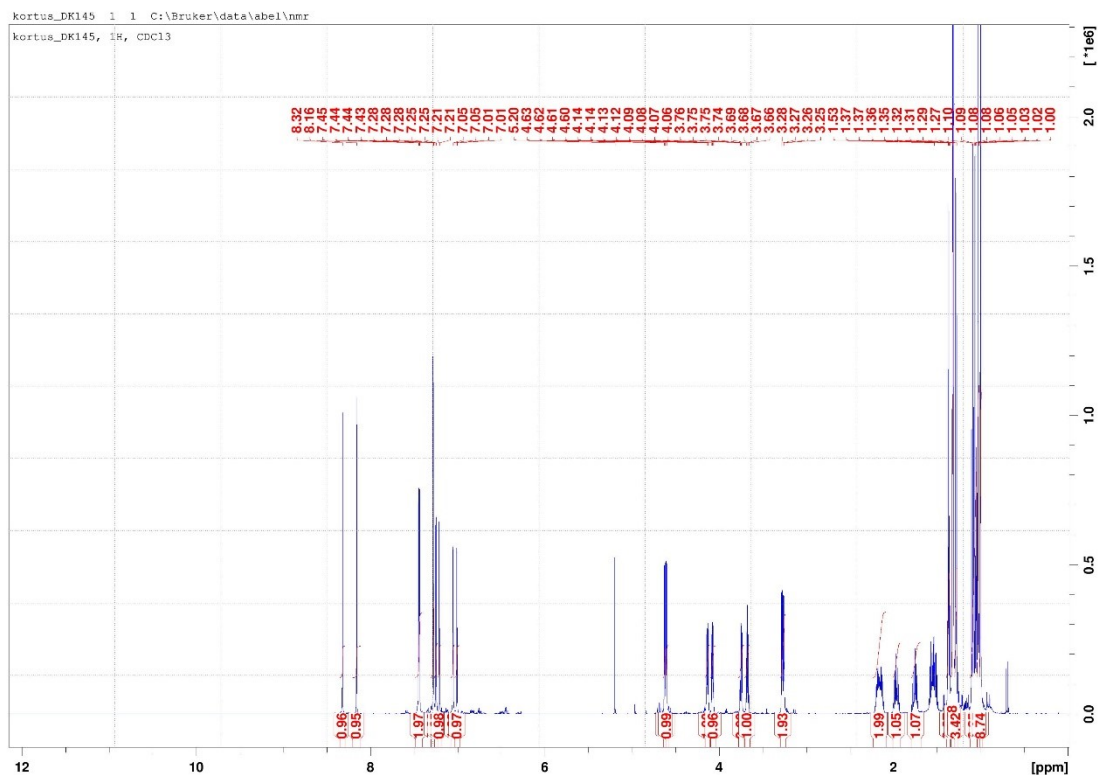

Figure 22.  $^1\text{H}$  NMR of compound 8 ( $\text{CDCl}_3$ , 600 MHz).

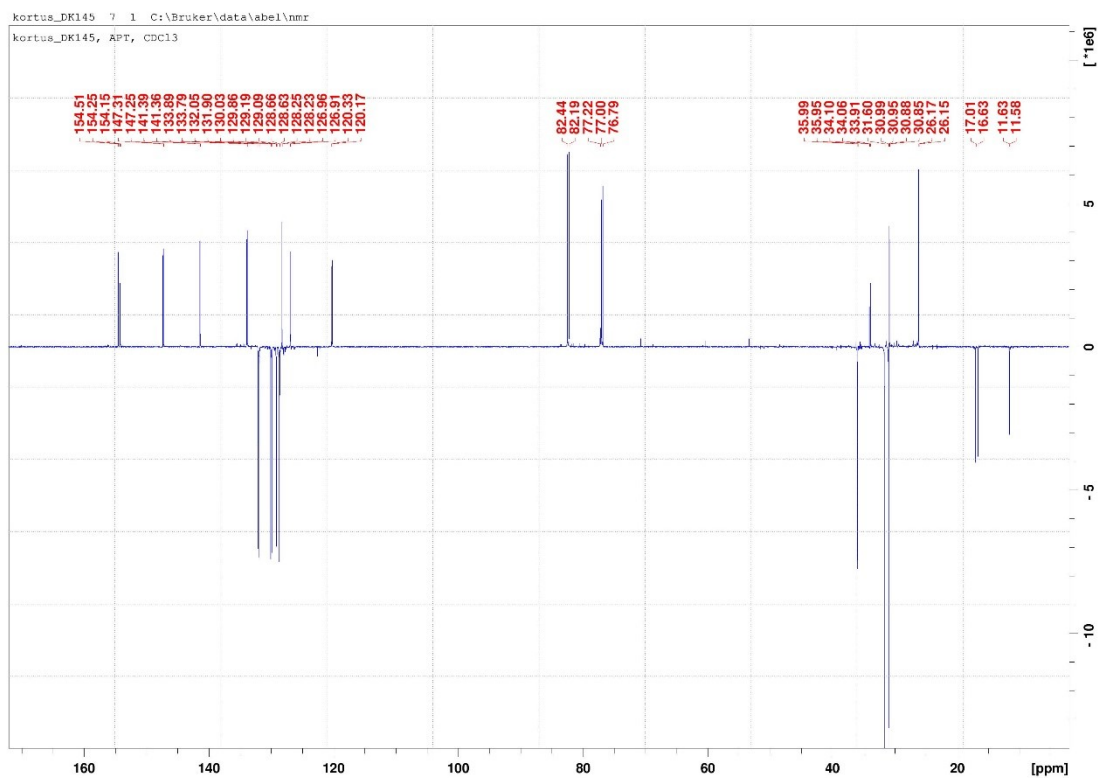

**Figure 23.**  $^{13}\text{C}$  NMR of compound **8** ( $\text{CDCl}_3$ , 151 MHz).

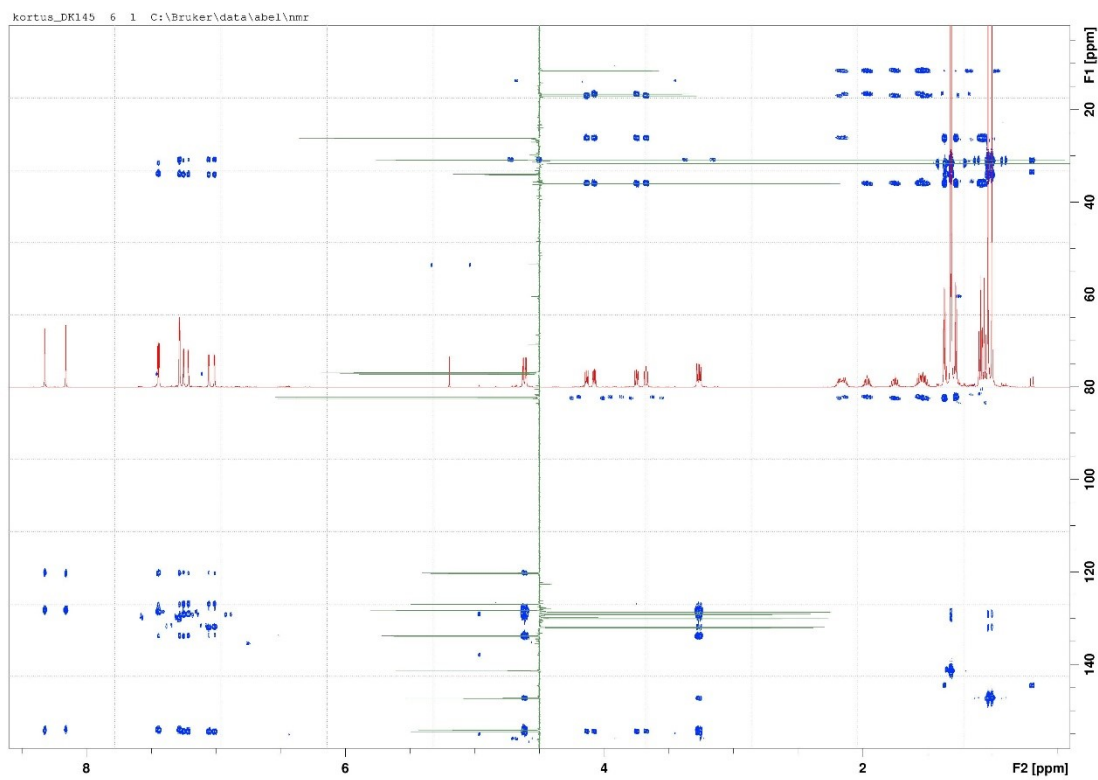

**Figure 24.** HMBC NMR of compound **8** ( $\text{CDCl}_3$ ).

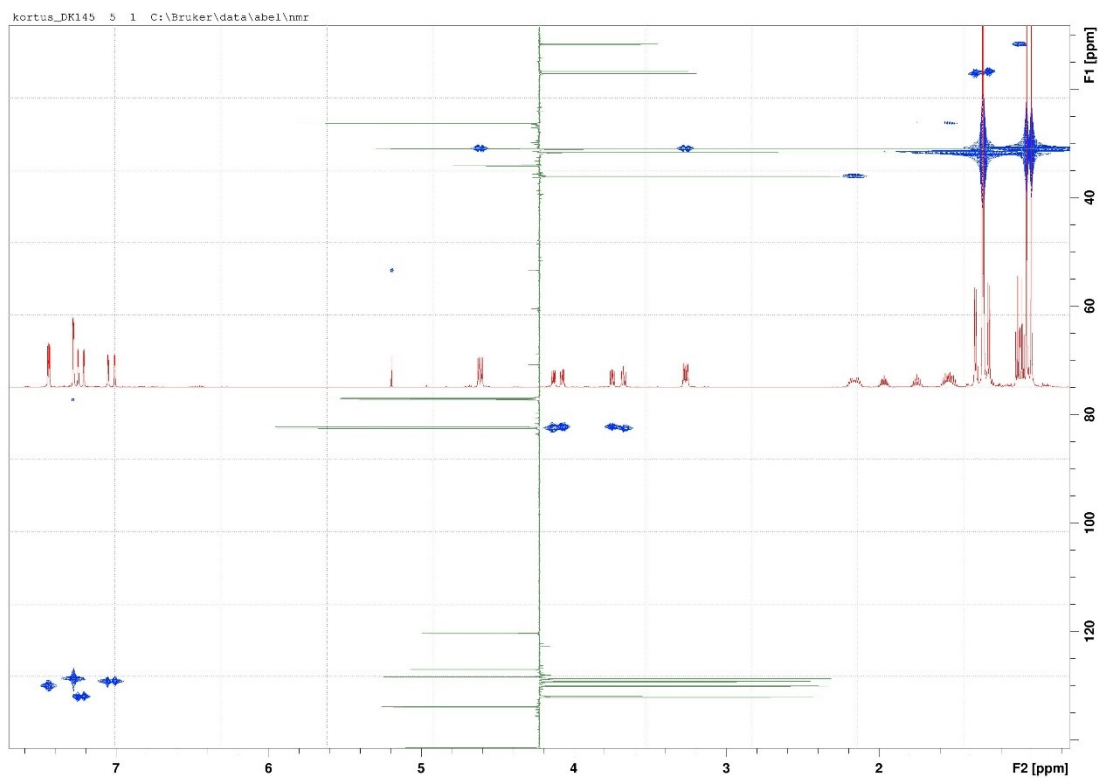

**Figure 25.** HMQC NMR of compound **8** ( $\text{CDCl}_3$ ).

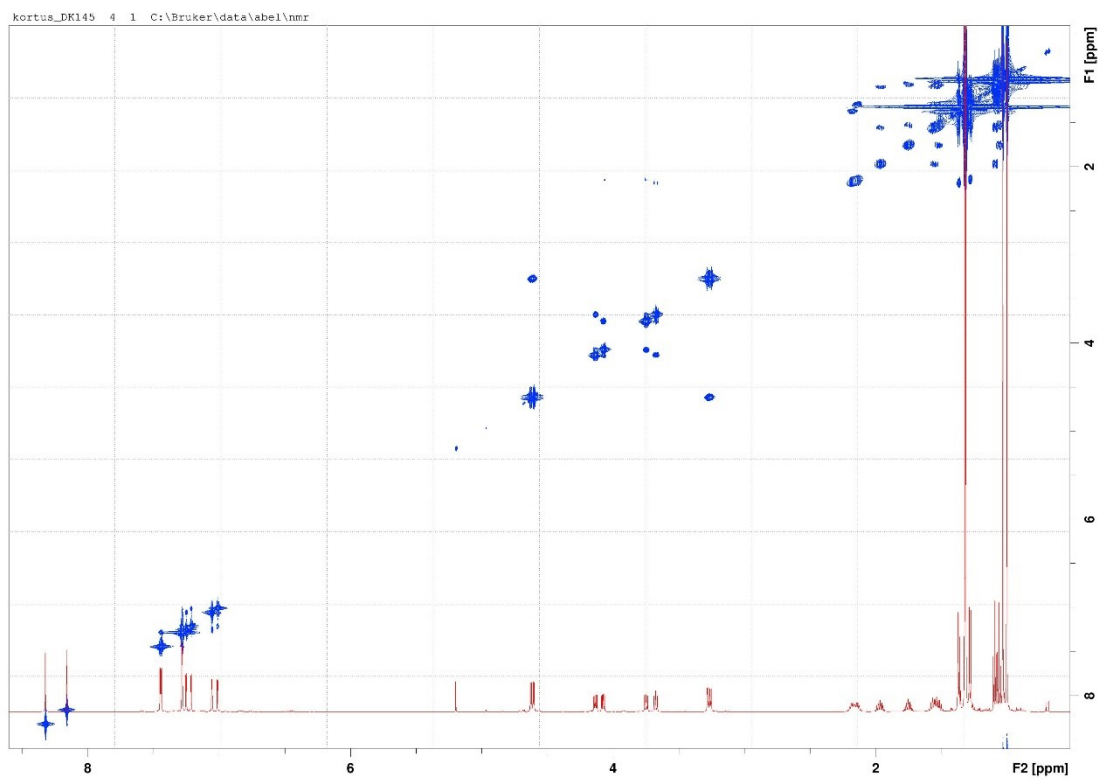

**Figure 26.** COSY NMR of compound **8** ( $\text{CDCl}_3$ ).

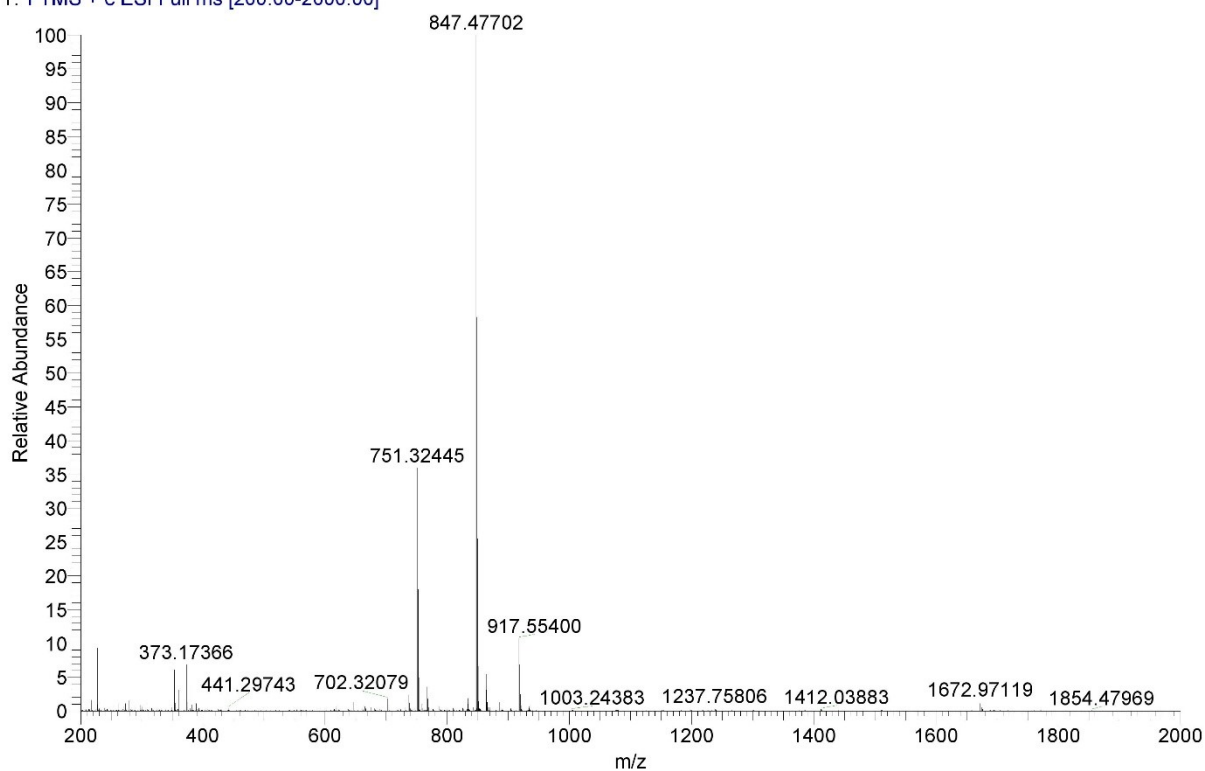

Figure 27. HRMS of compound 8 (ESI<sup>+</sup>).

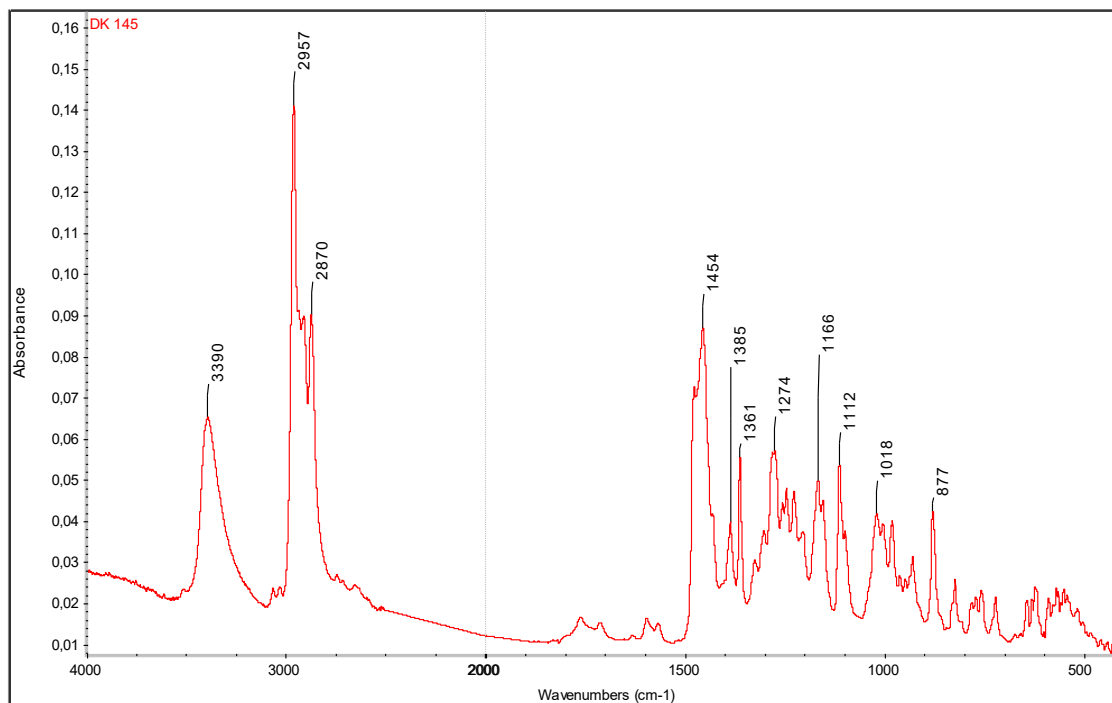

Figure 28. IR of compound 8 (KBr).

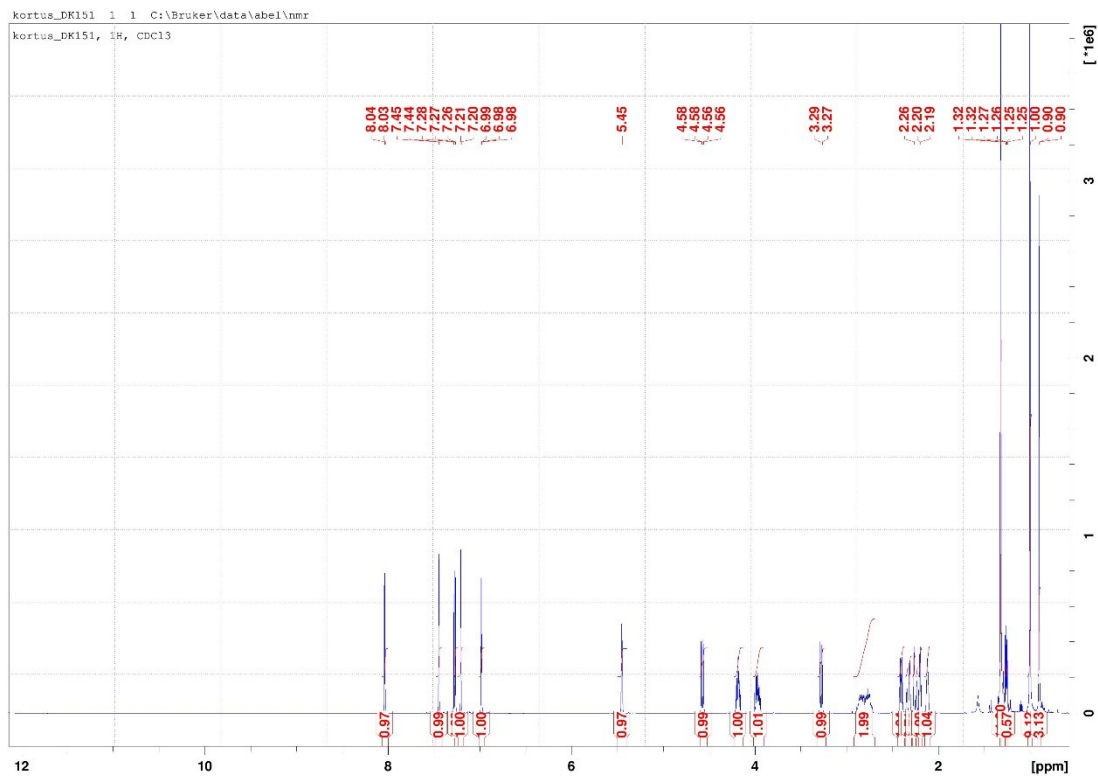

**Figure 29.**  $^1\text{H}$  NMR of compound **9** ( $\text{CDCl}_3$ , 600 MHz).

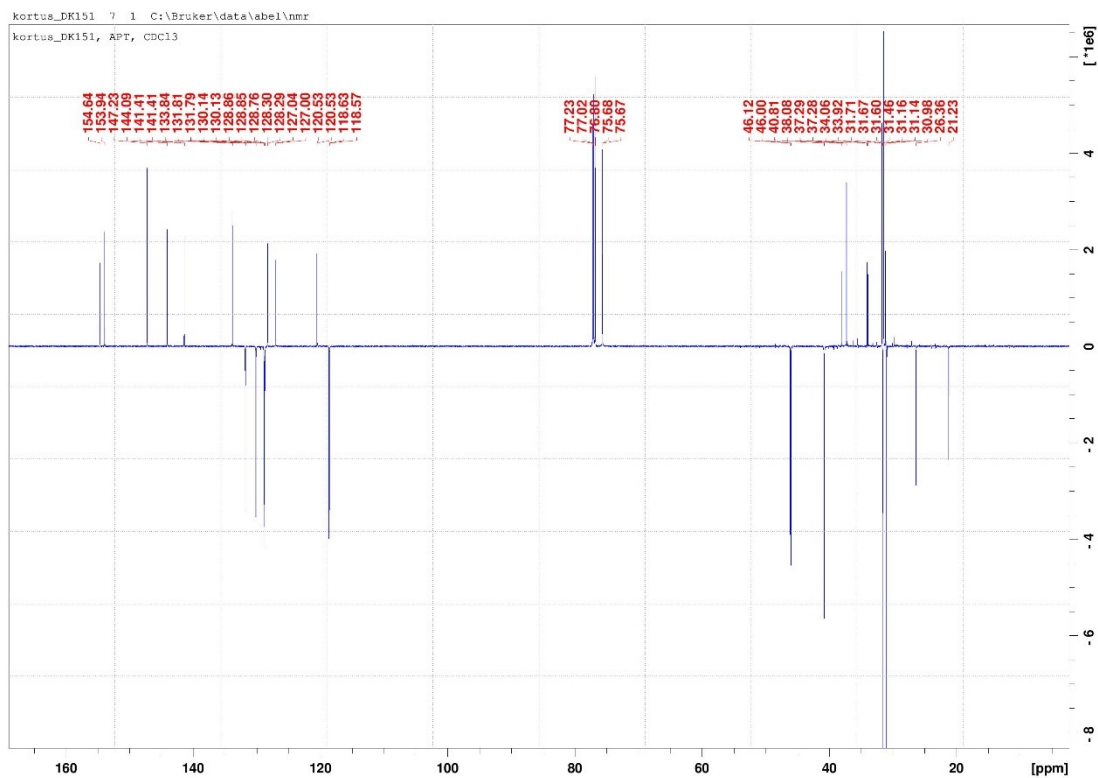

**Figure 30.**  $^{13}\text{C}$  NMR of compound **9** ( $\text{CDCl}_3$ , 151 MHz).



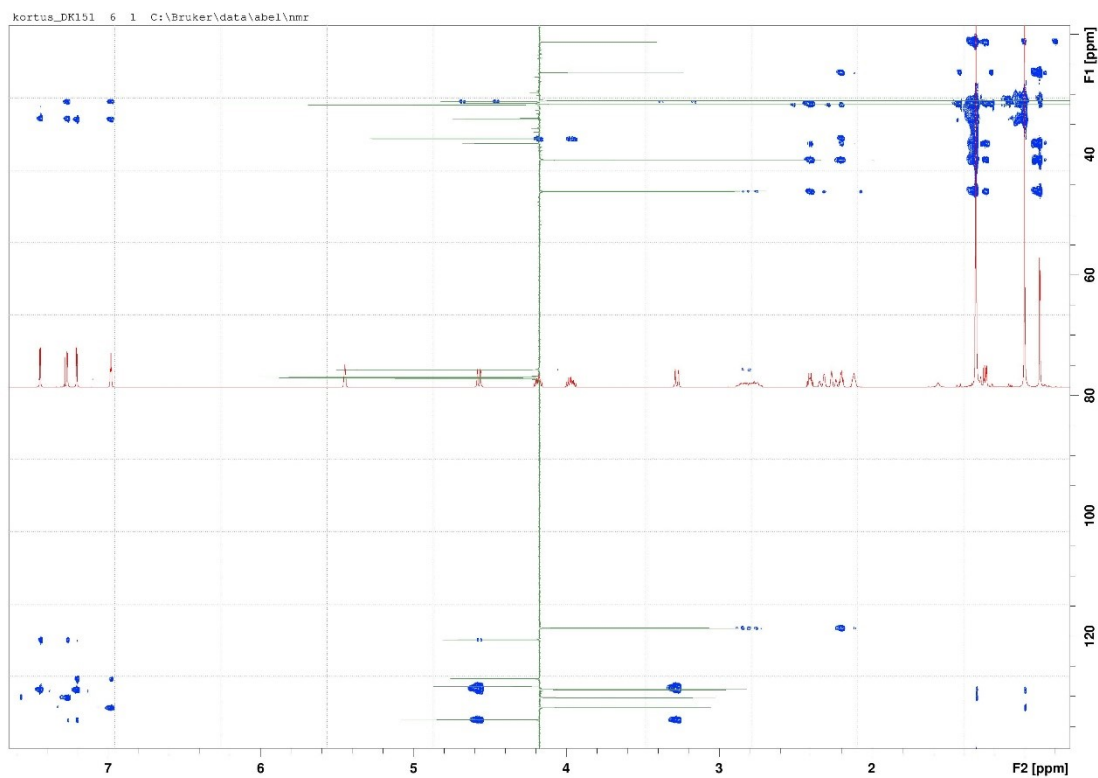

**Figure 31.** HMBC NMR of compound **9** (CDCl<sub>3</sub>).

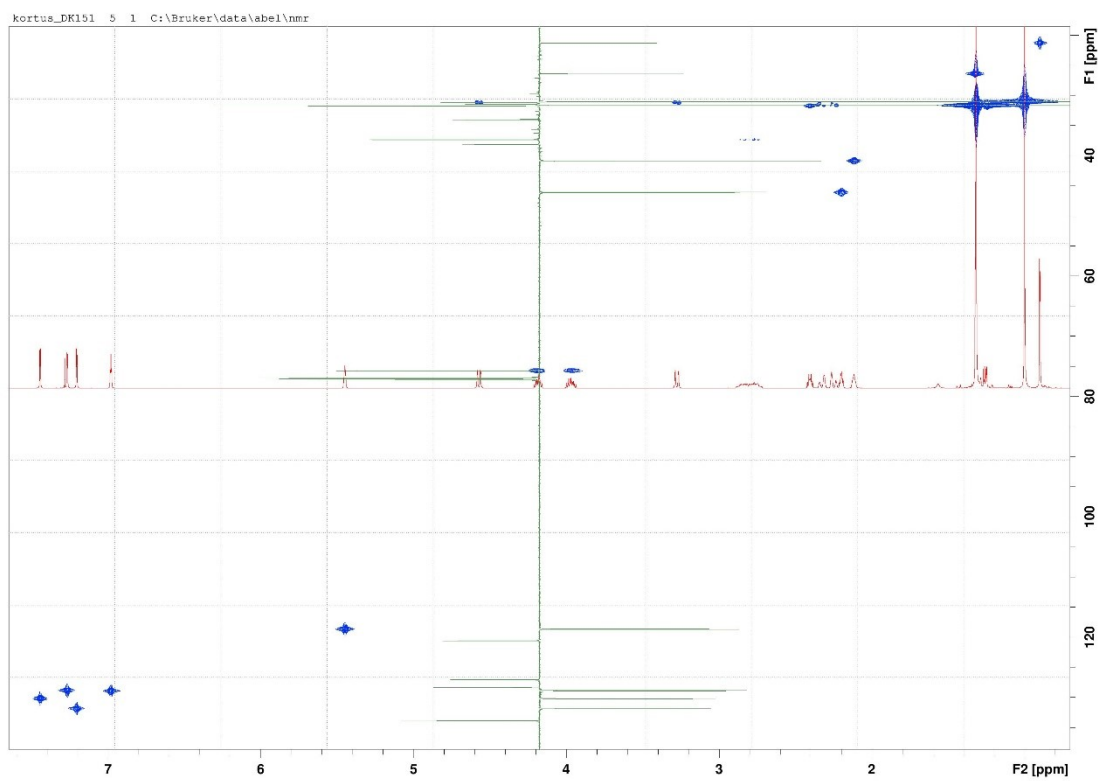

**Figure 32.** HMQC NMR of compound **9** (CDCl<sub>3</sub>).

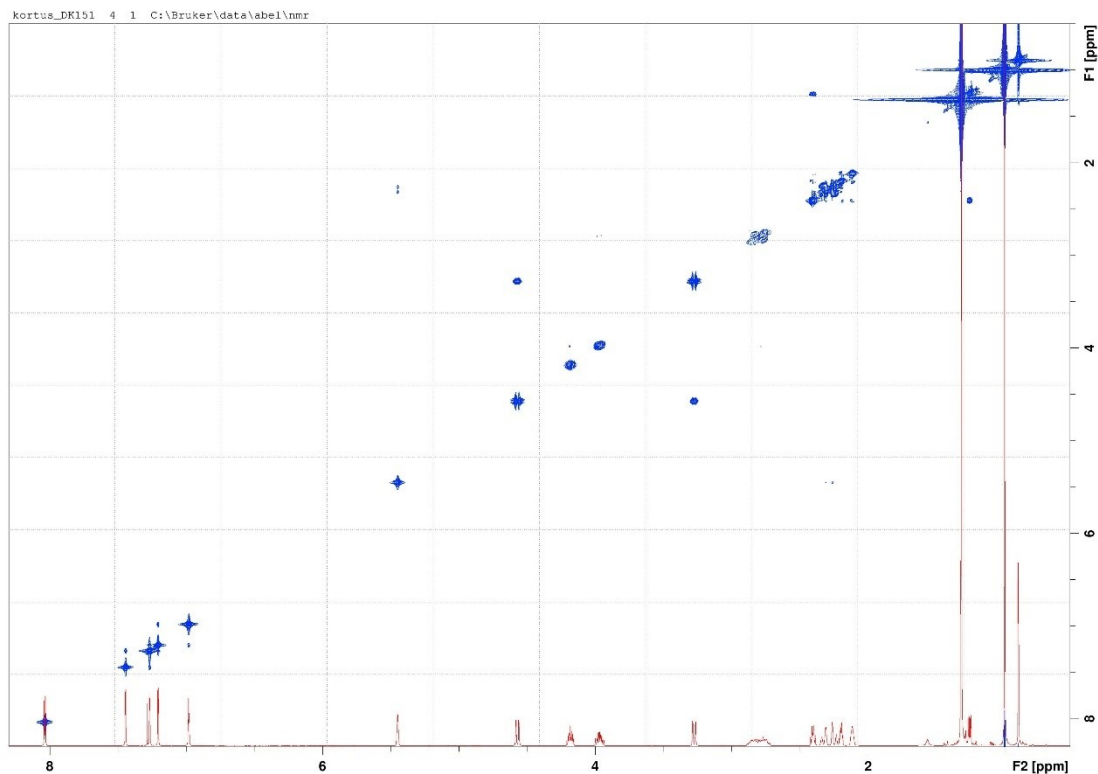

**Figure 33.** COSY NMR of compound **9** ( $\text{CDCl}_3$ ).

14\_Kortus\_ESIpos\_DK151\_1 4/3/2020 3:13:14 PM  
 MetOH  
 14\_Kortus\_ESIpos\_DK151\_1 #27-32 RT: 0.38-0.46 AV: 6 NL: 1.88E7  
 T: FTMS + c ESI Full ms [250.00-2000.00]

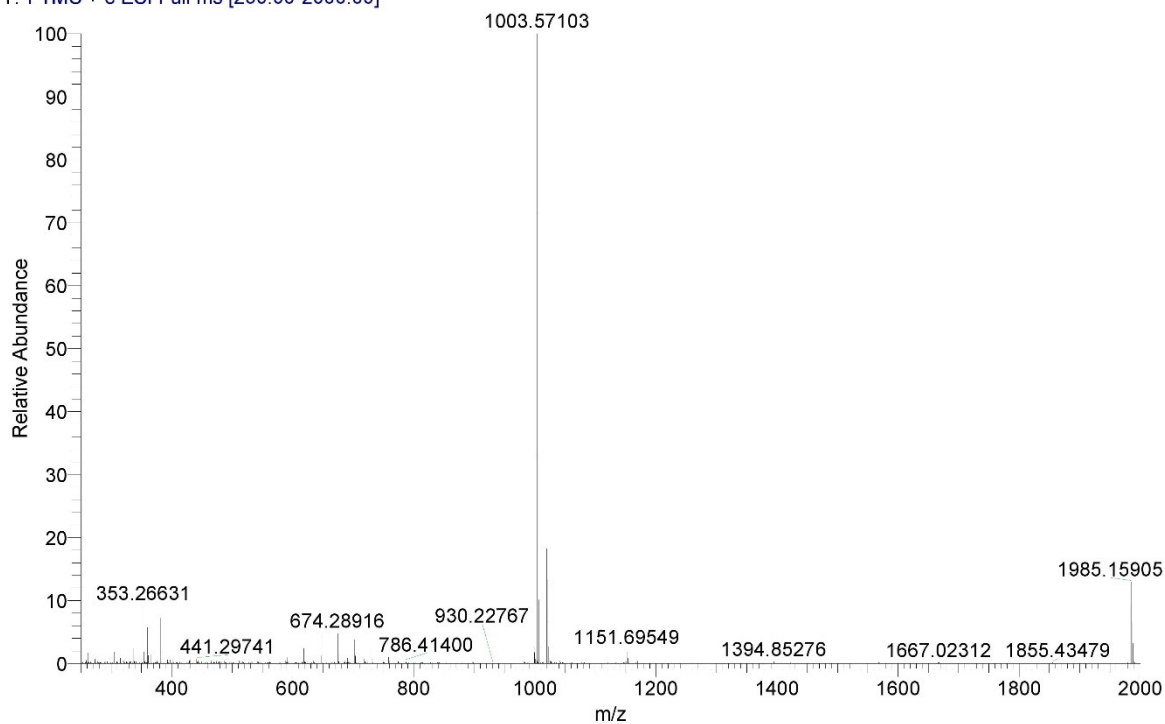

**Figure 34.** HRMS of compound **9** ( $\text{ESI}^+$ ).



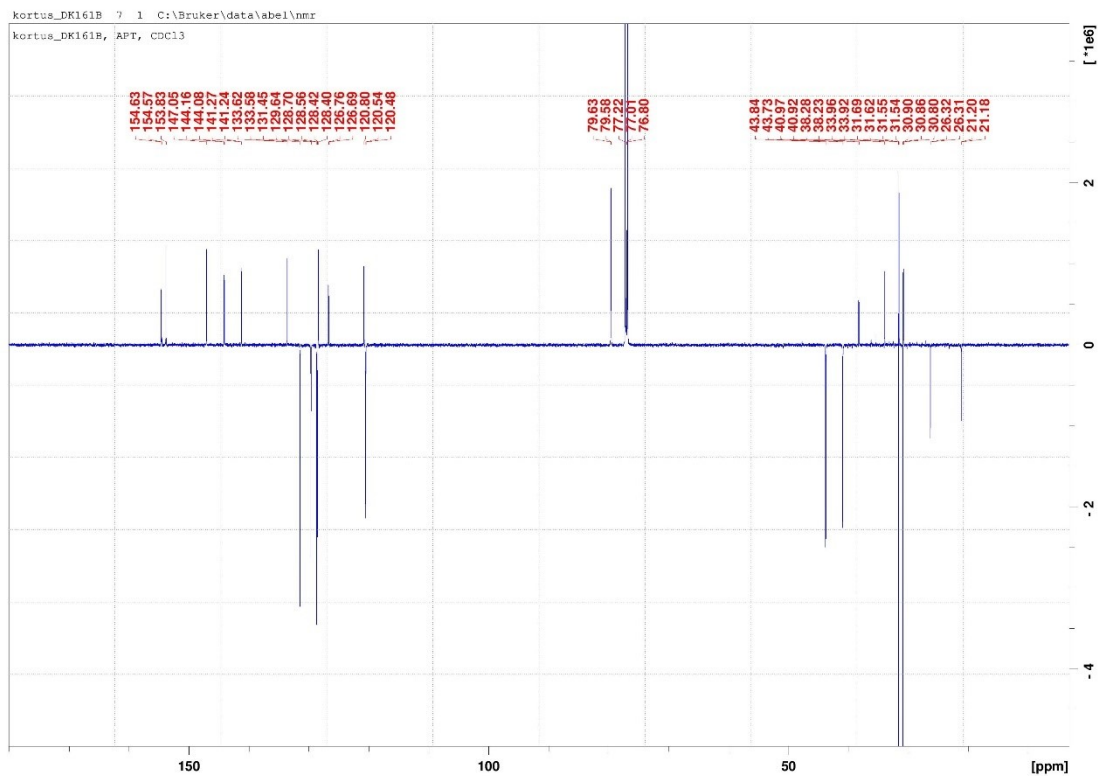

**Figure 37.**  $^{13}\text{C}$  NMR of compound **10** ( $\text{CDCl}_3$ , 151 MHz).

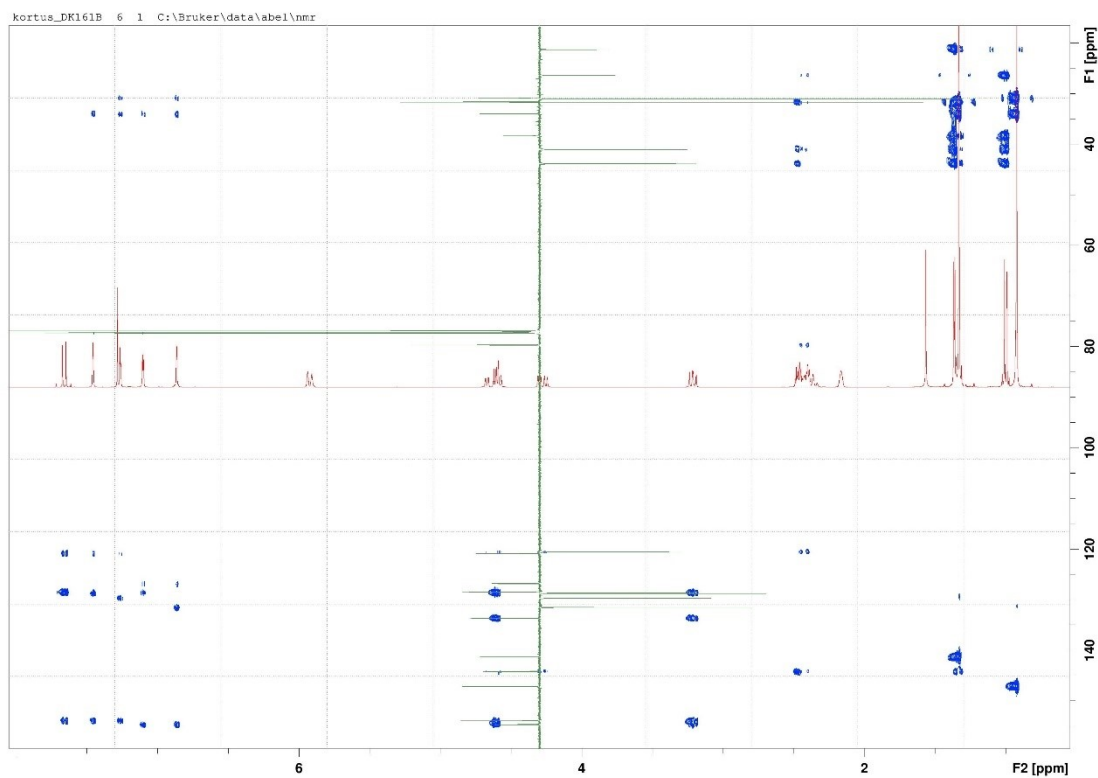

**Figure 38.** HMBC NMR of compound **10** ( $\text{CDCl}_3$ ).

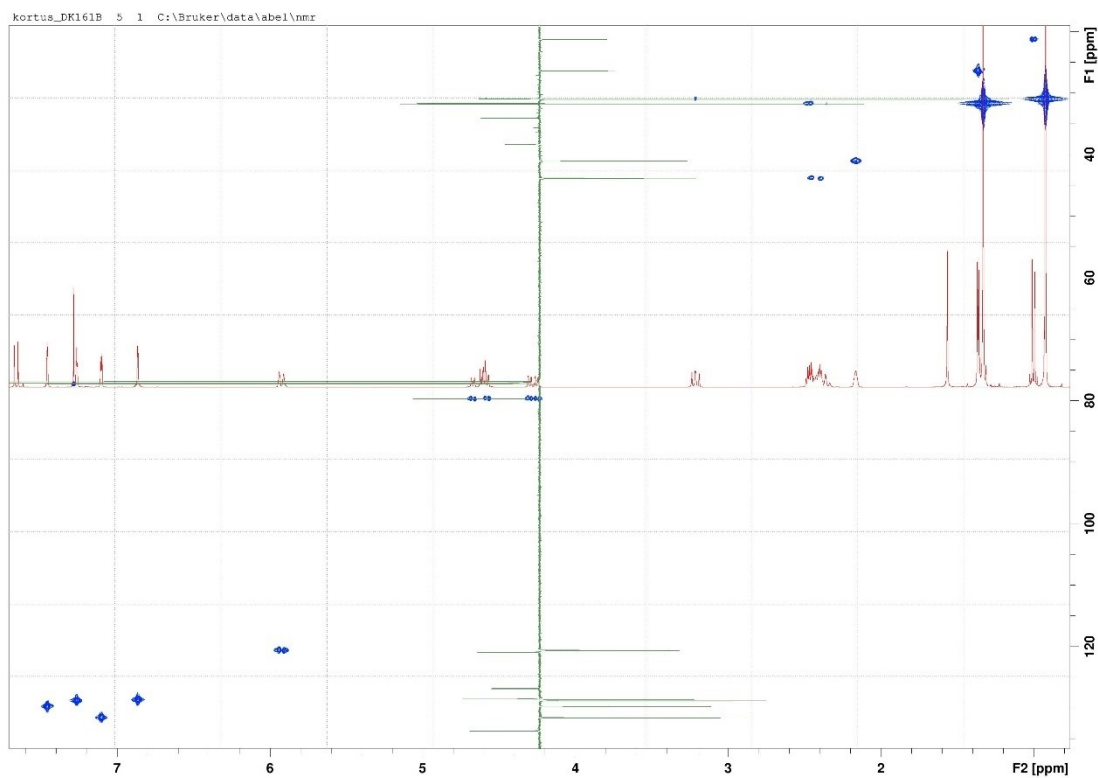

**Figure 39.** HMBC NMR of compound **10** ( $\text{CDCl}_3$ ).

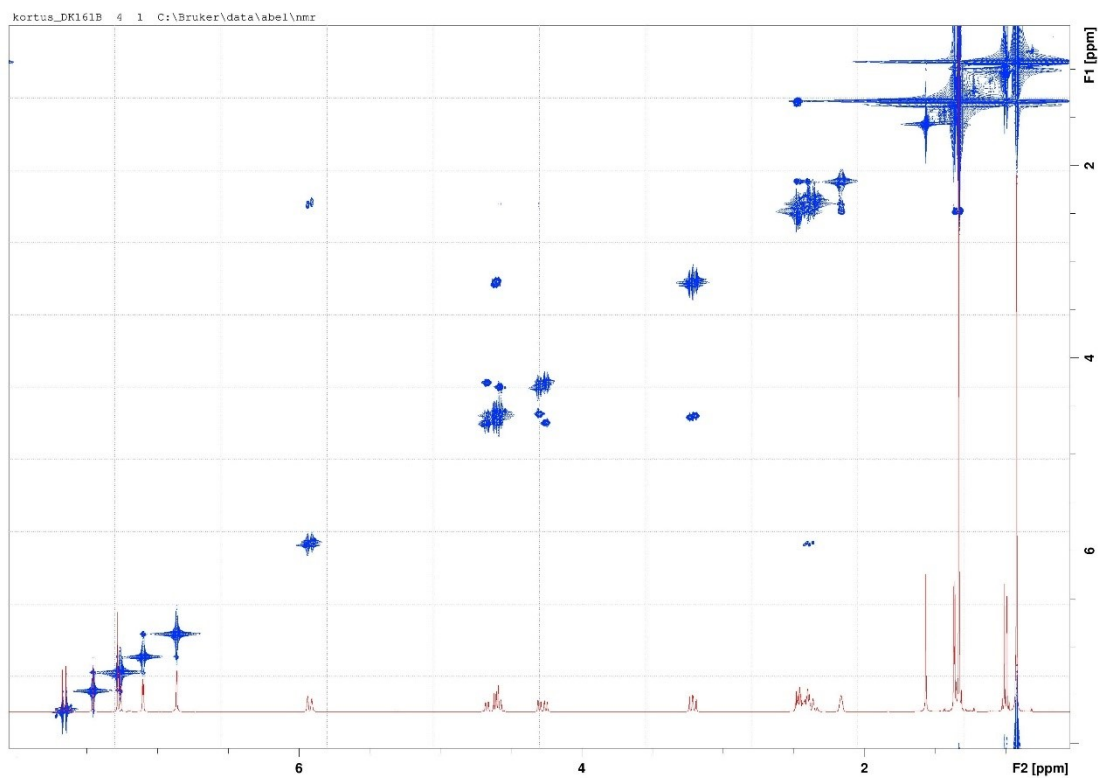

**Figure 40.** COSY NMR of compound **10** ( $\text{CDCl}_3$ ).

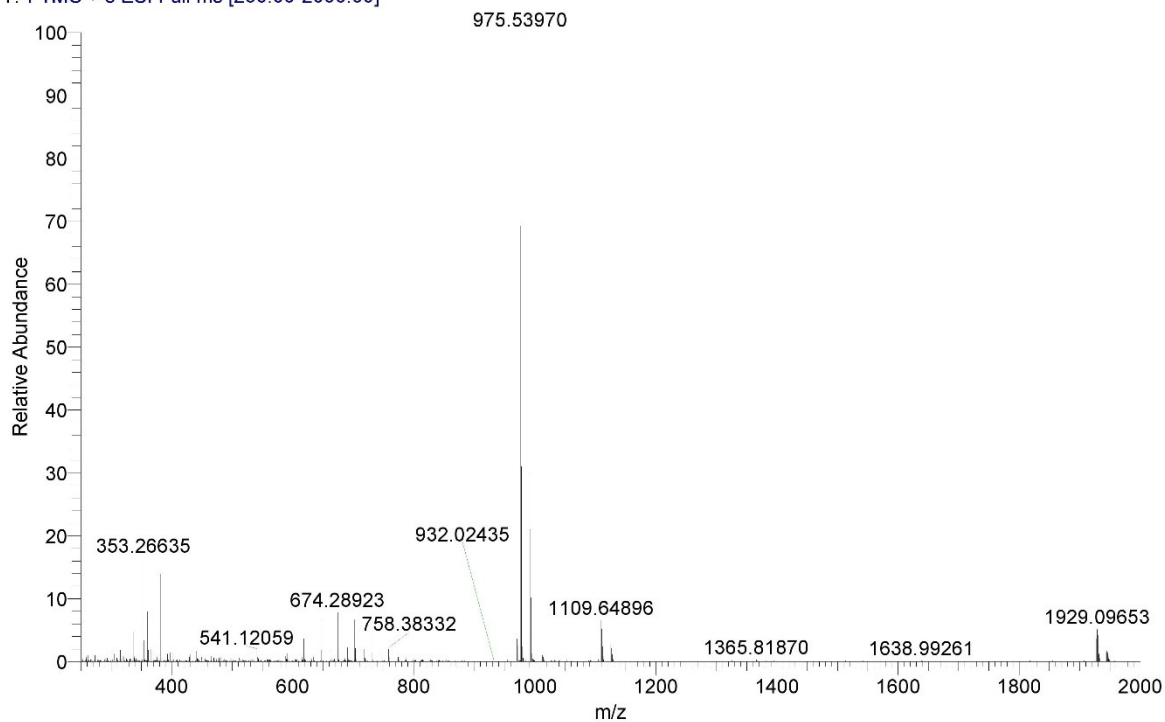

Figure 41. HRMS of compound 10 (ESI<sup>+</sup>).

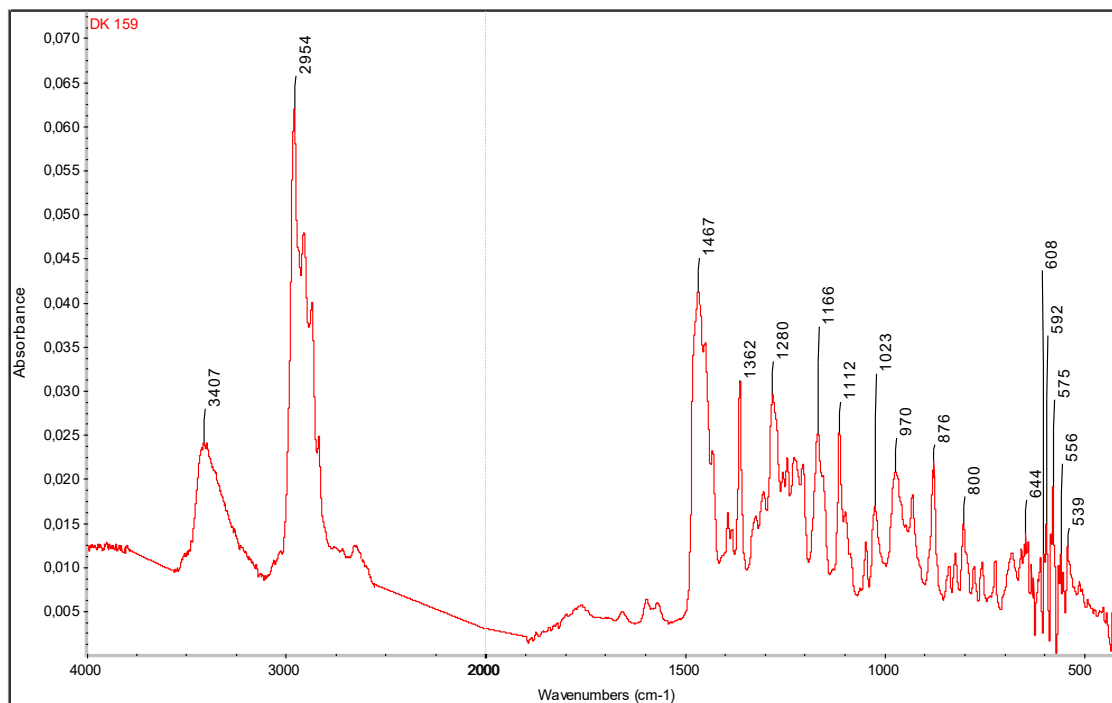

Figure 42. IR of compound 10 (KBr).



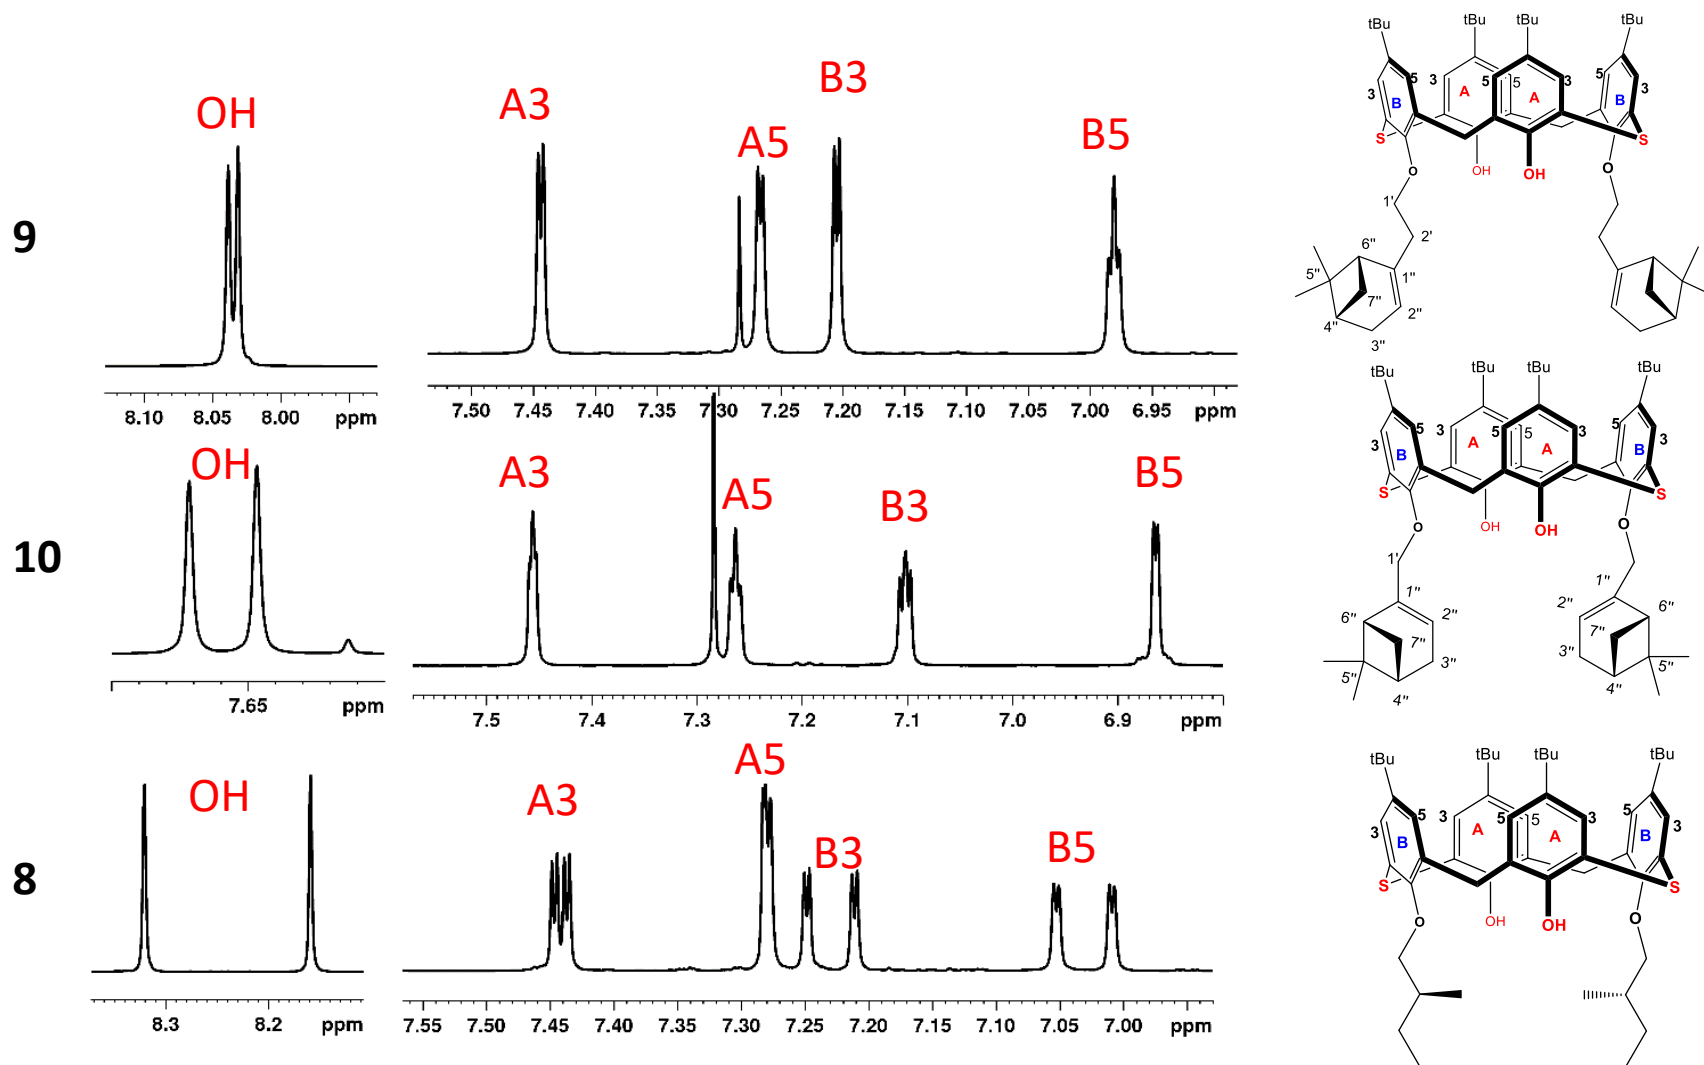

Fig. 44. Comparison of partial  $^1\text{H}$  NMR spectra (aromatic region) of **8**, **9** and **10** (298 K,  $\text{CDCl}_3$ , 600 MHz).



## 2. CRYSTALLOGRAPHIC STRUCTURES

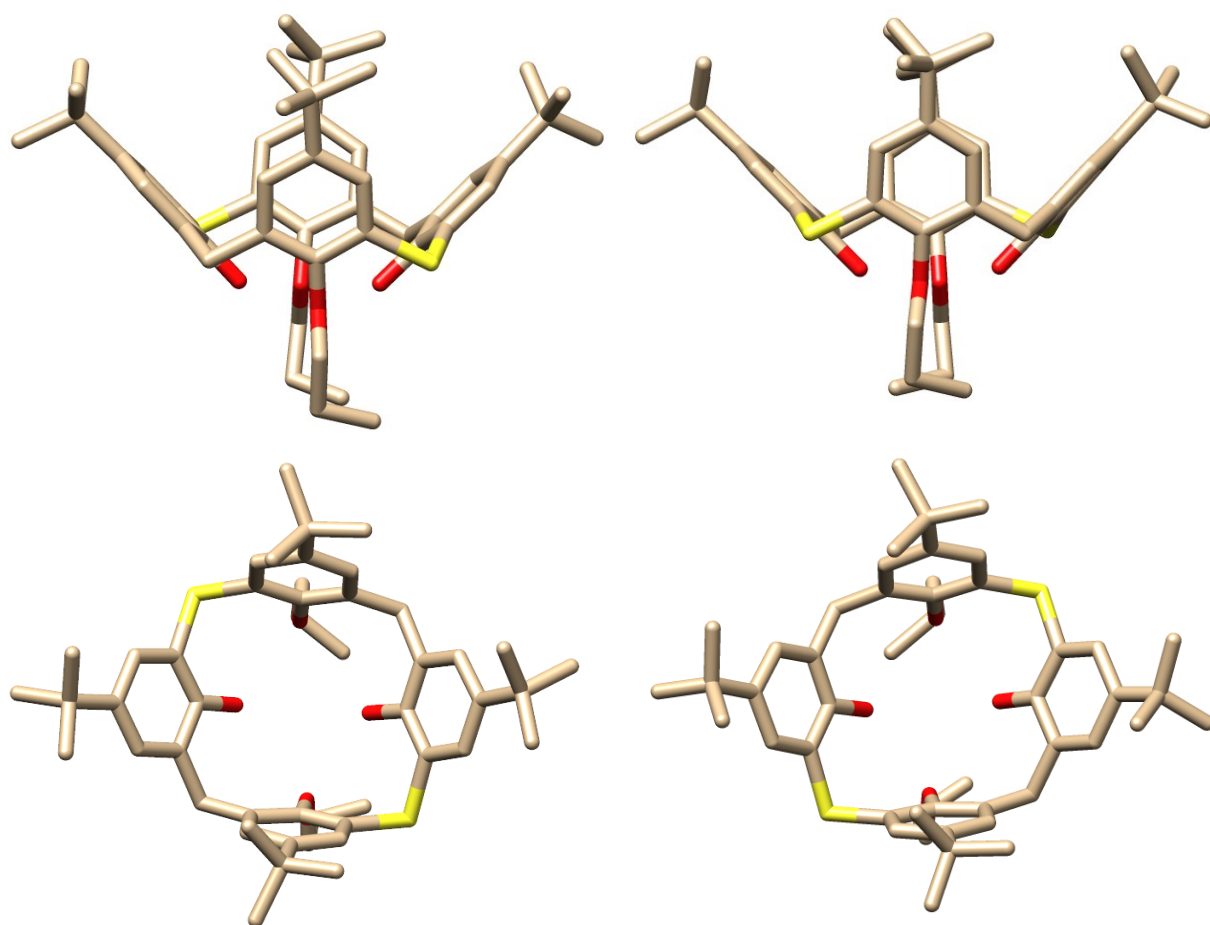

**Figure 45.** Crystallographic structures of two enantiomers of compound 4.

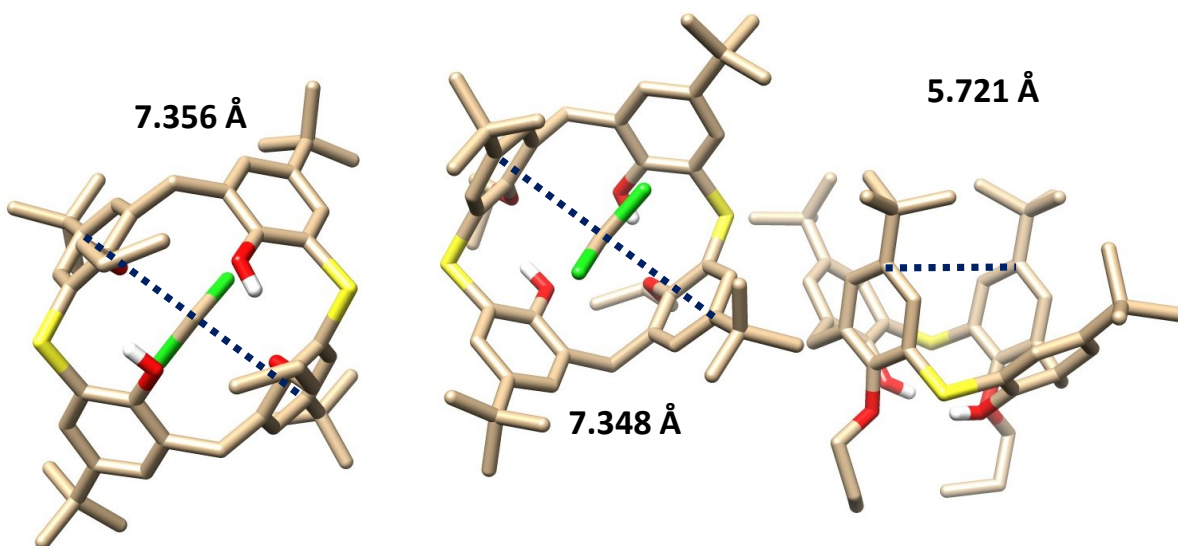

**Figure 46.** Crystallographic structure of compound **4** - three symmetrically independent molecules in the unit cell, two of them containing solvent molecule (DCM).

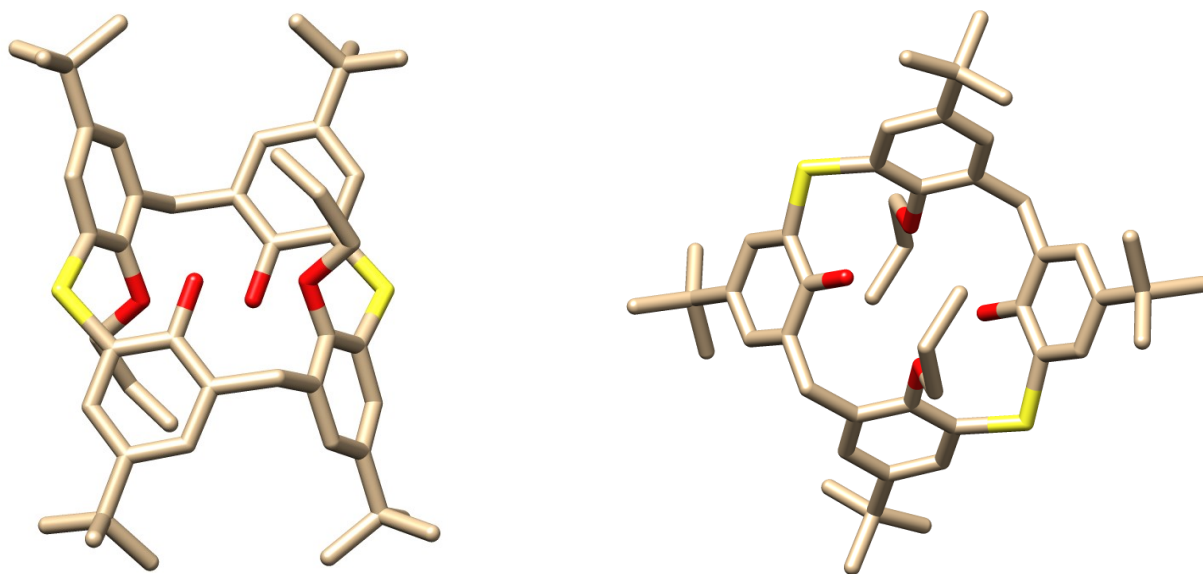

**Figure 47.** Crystallographic structure of compound 5.

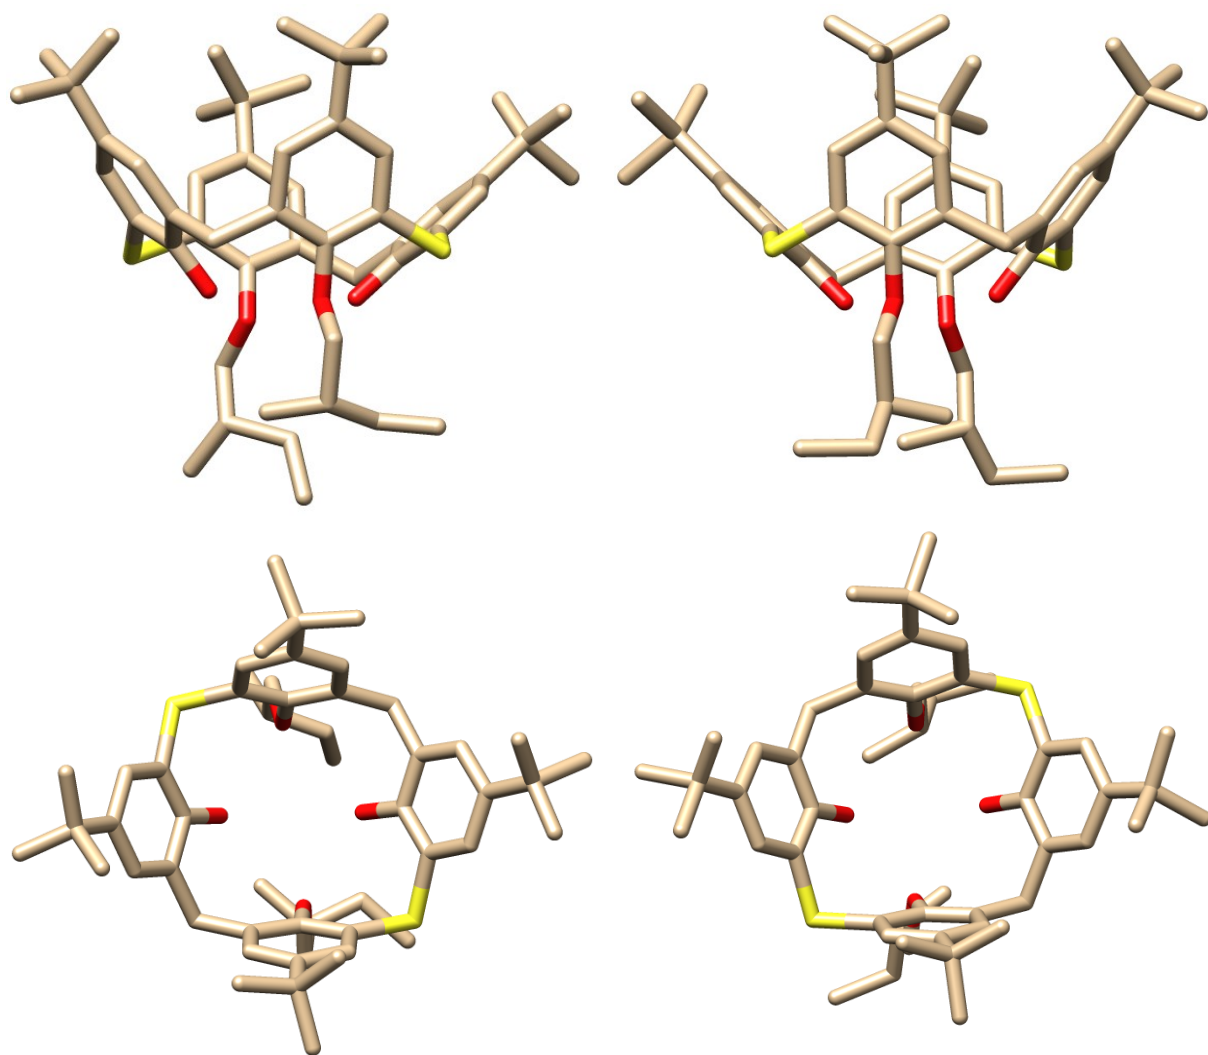

**Figure 48.** Crystallographic structures of two diastereomers of compound **8**.

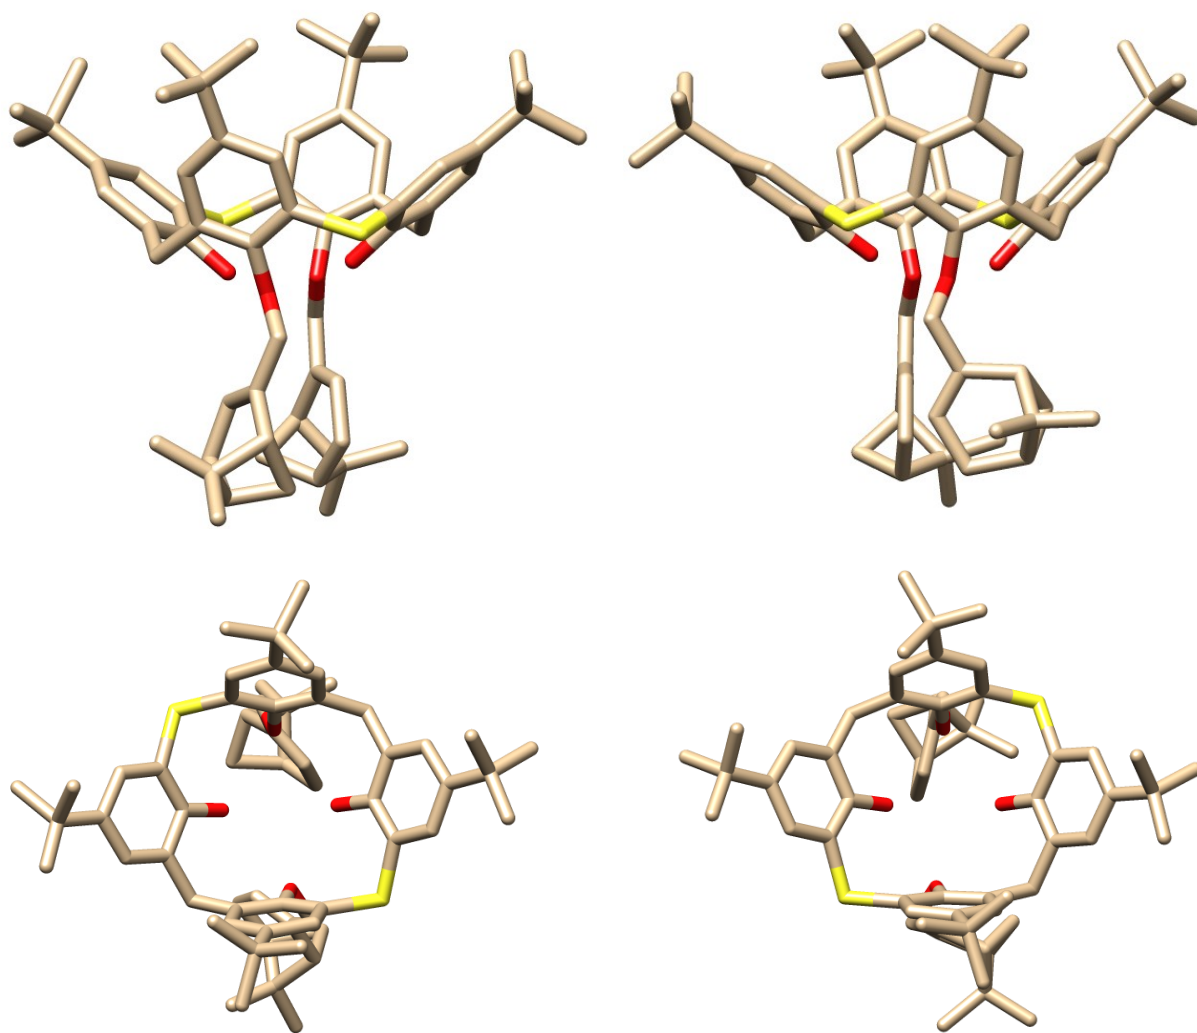

**Figure 49.** Crystallographic structures of two diastereomers of compound **10**.

### 3. HPLC MEASUREMENTS

Compounds **4**, **8** and **9** were subjected to HPLC on a chiral column Chiralpak IA (250 × 4.6 mm ID, 10 μm) using heptane:CH<sub>2</sub>Cl<sub>2</sub> = 90:10 or 95:5 v/v as a mobile phase. Flow rate was 0.7 mL min<sup>-1</sup>, column temperature 298 K and detection wavelength 254 nm. These conditions have led to a base-line separation of two peaks.

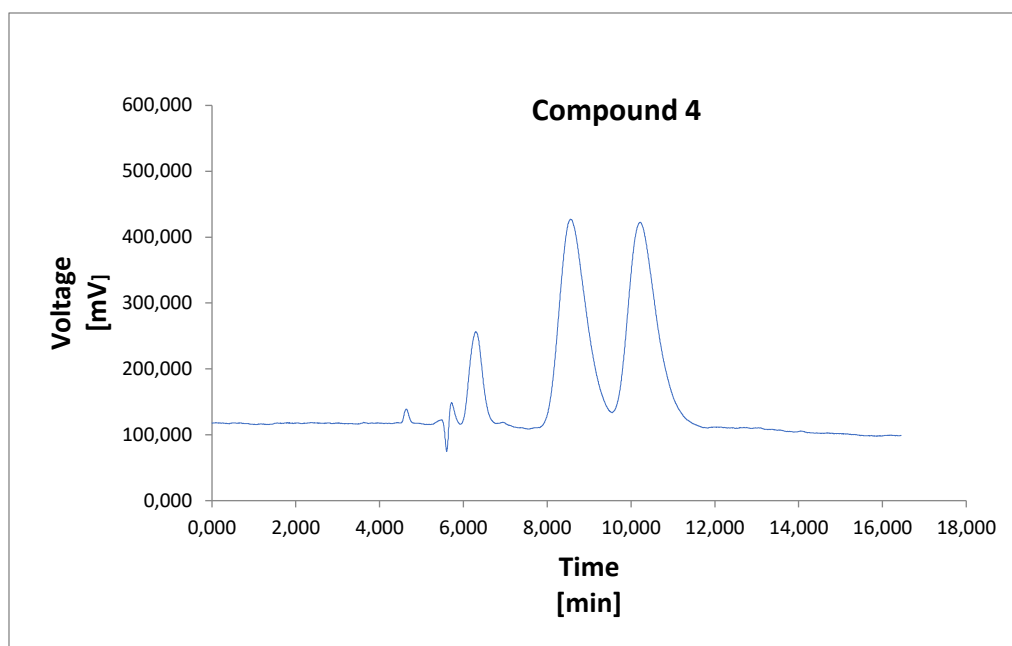

**Figure 50.** HPLC measurement of compound **4**, mobile phase: heptane:CH<sub>2</sub>Cl<sub>2</sub> = 90:10, retention times: 8.55 and 10.22 min.

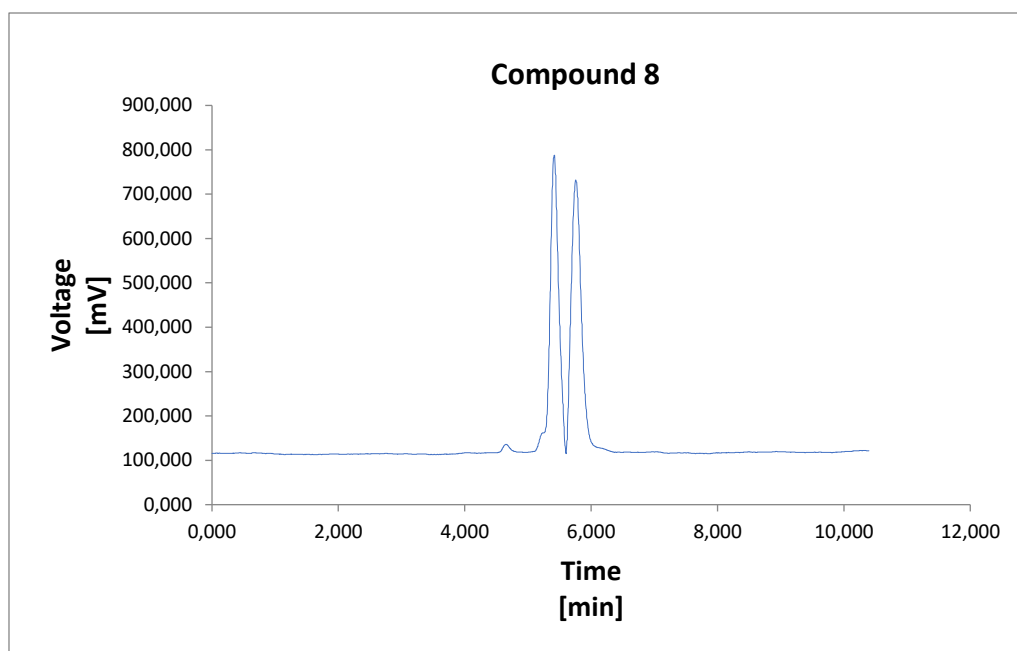

**Figure 51.** HPLC measurement of compound **8**, mobile phase: heptane:CH<sub>2</sub>Cl<sub>2</sub> = 95:5, retention times: 5.42 and 5.76 min.

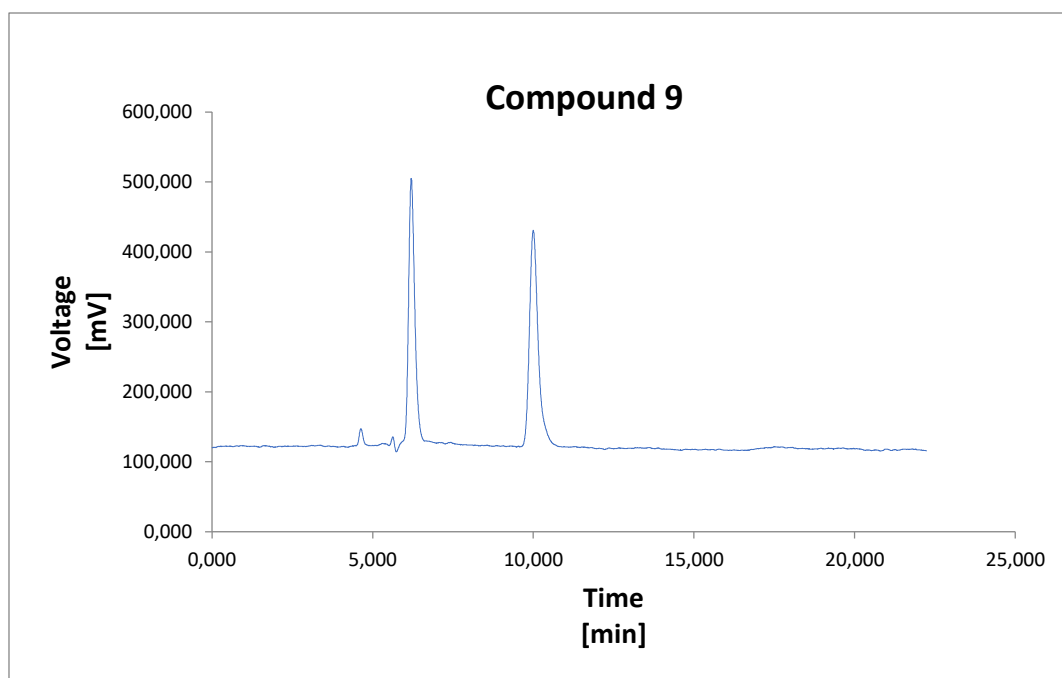

**Figure 52.** HPLC measurement of compound **9**, mobile phase: heptane:CH<sub>2</sub>Cl<sub>2</sub> = 95:5, retention times: 6.20 and 10.22 min.
